# Supplementary material
Source: PubMed Central journal article supplement (PMC4527656)
Supplement: NIHMS698411-supplement-Supporting_Information.pdf [file NIHMS698411-supplement-Supporting_Information.pdf]

# Supporting Information

for

## A Convergent Synthesis of 6-O-Branched $\beta$ -Glucan Oligosaccharides

Guochao Liao, Srinivas Burgula, Zhifang Zhou, and Zhongwu Guo\*

Department of Chemistry, Wayne State University, 5101 Cass Avenue, Detroit, MI, 48202, USA

\*Corresponding author: E-mail: [zwguo@chem.wayne.edu](mailto:zwguo@chem.wayne.edu)

### Table of Contents:

|                                            |    |
|--------------------------------------------|----|
| NMR Spectra of Synthesized Compounds ..... | S1 |
|--------------------------------------------|----|

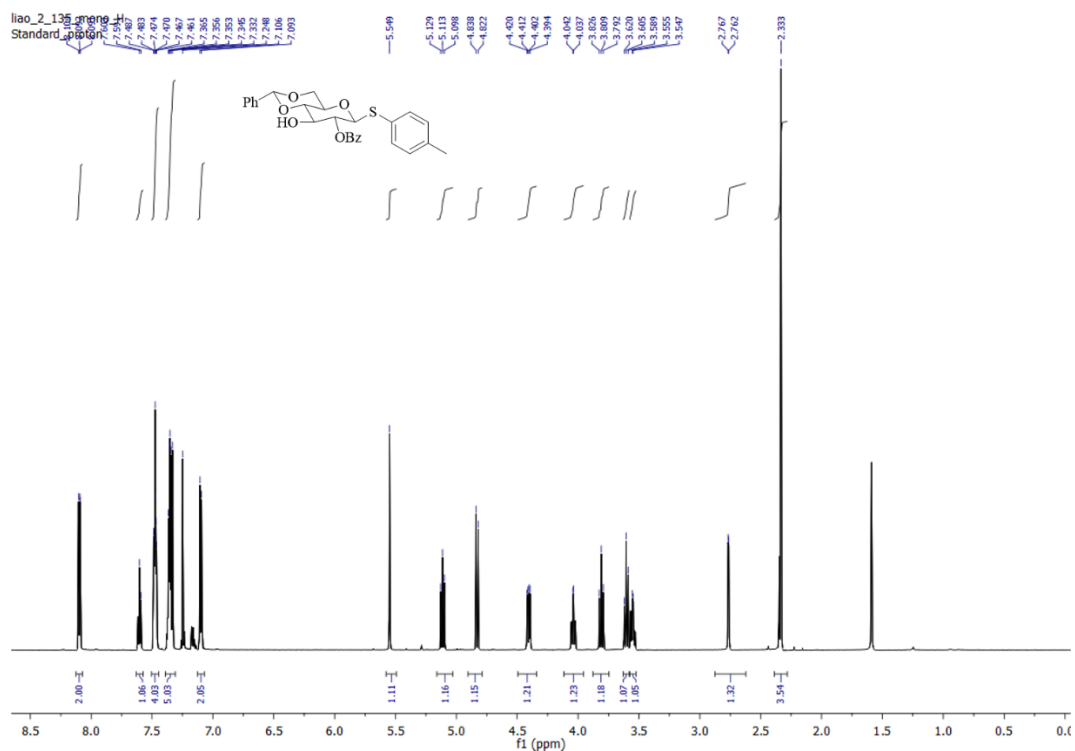

$^1\text{H}$  NMR Spectrum of compound **10** ( $\text{CDCl}_3$ , 600 MHz)



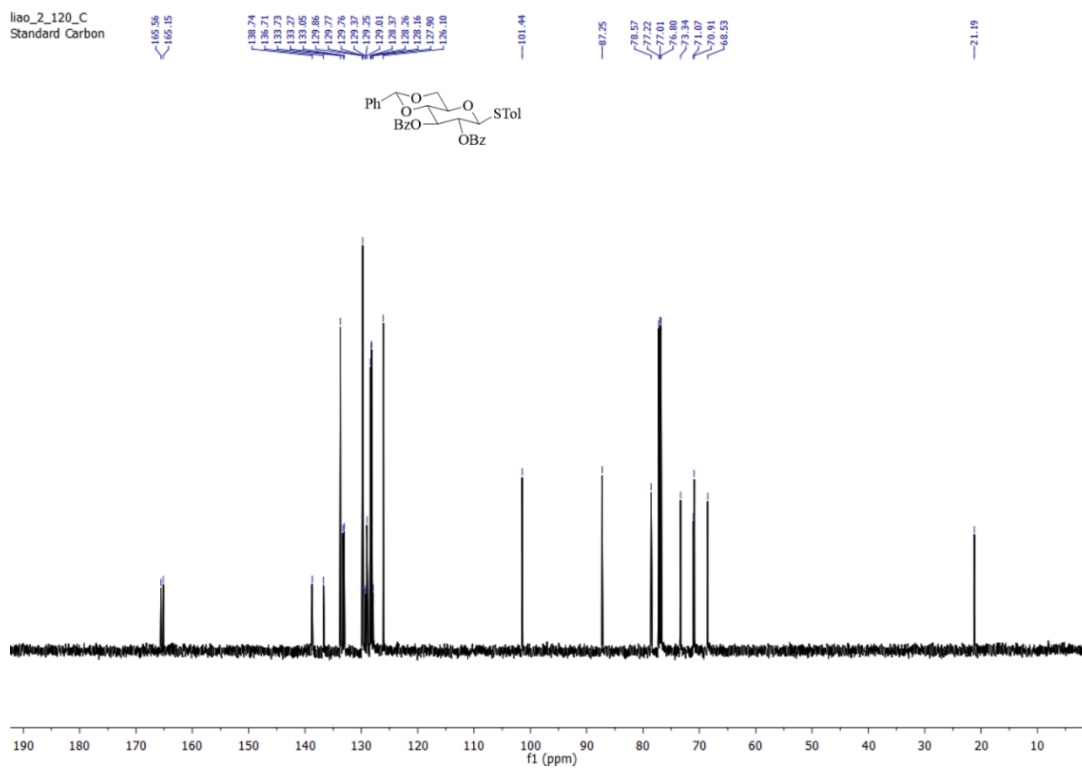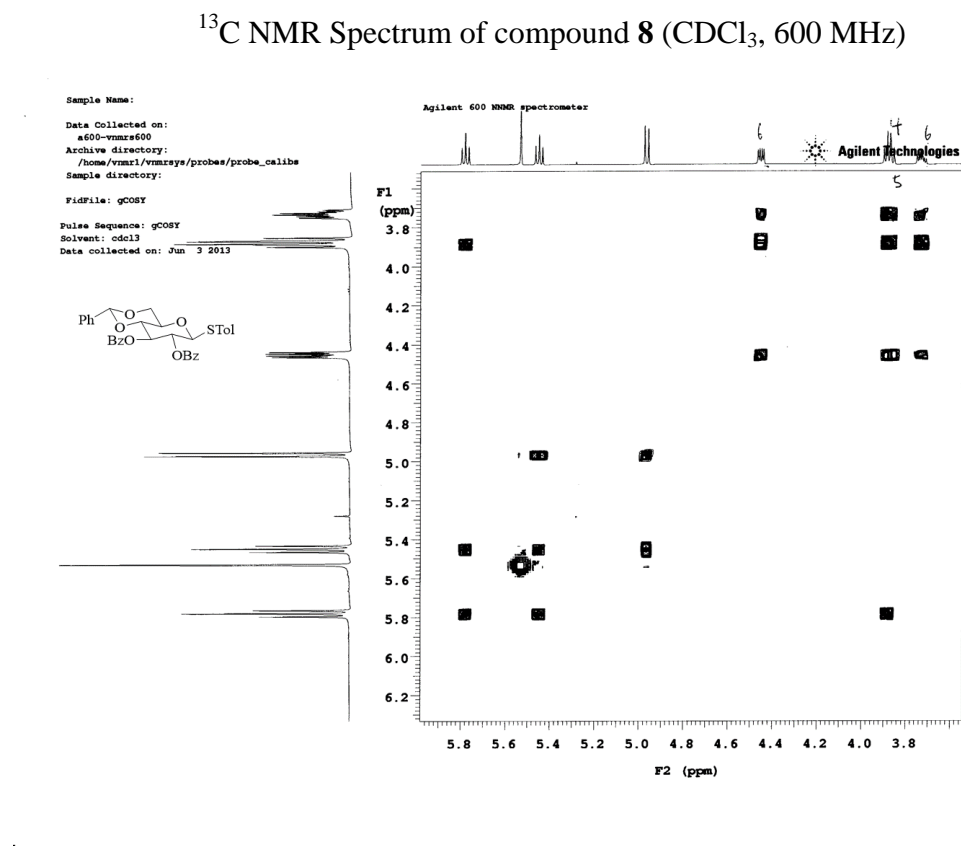

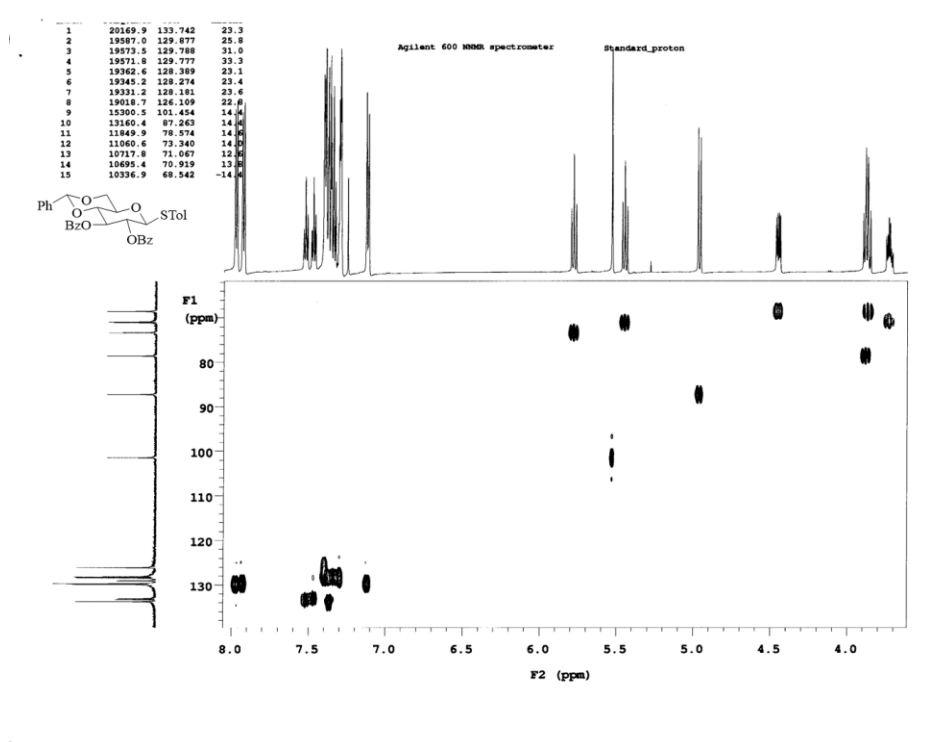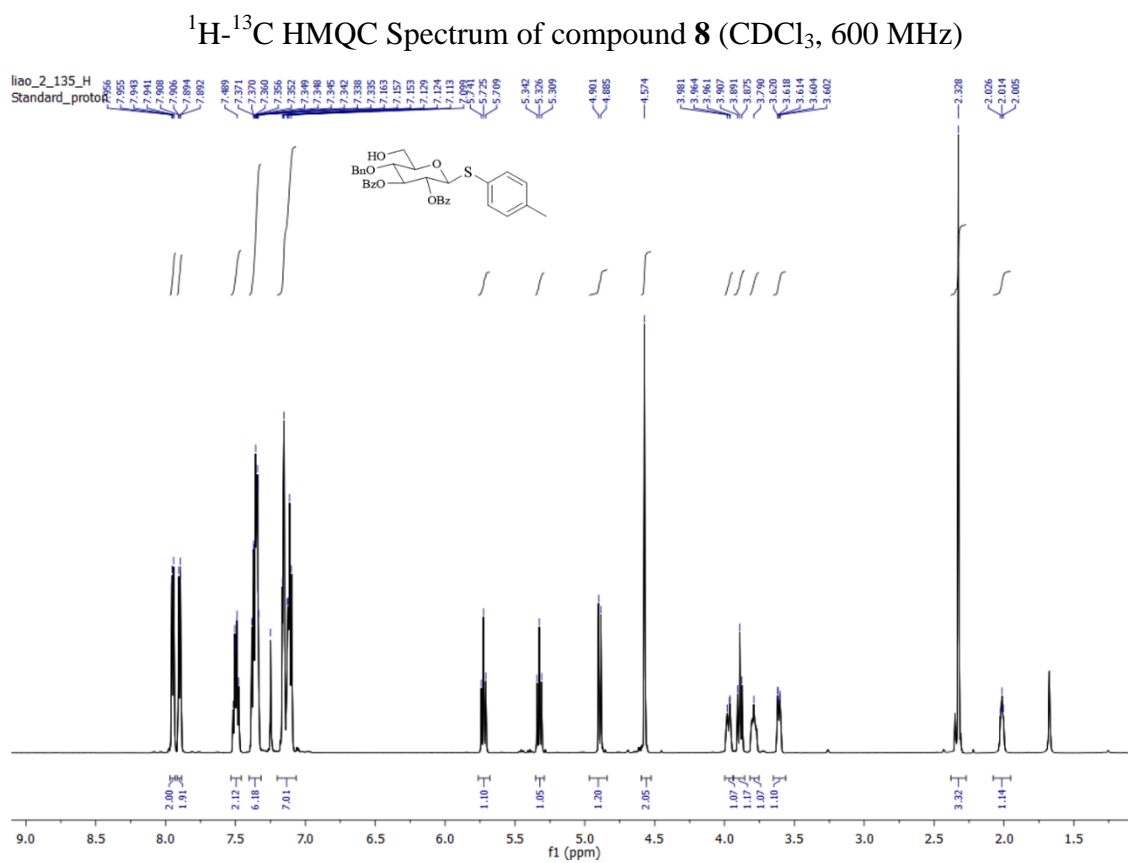

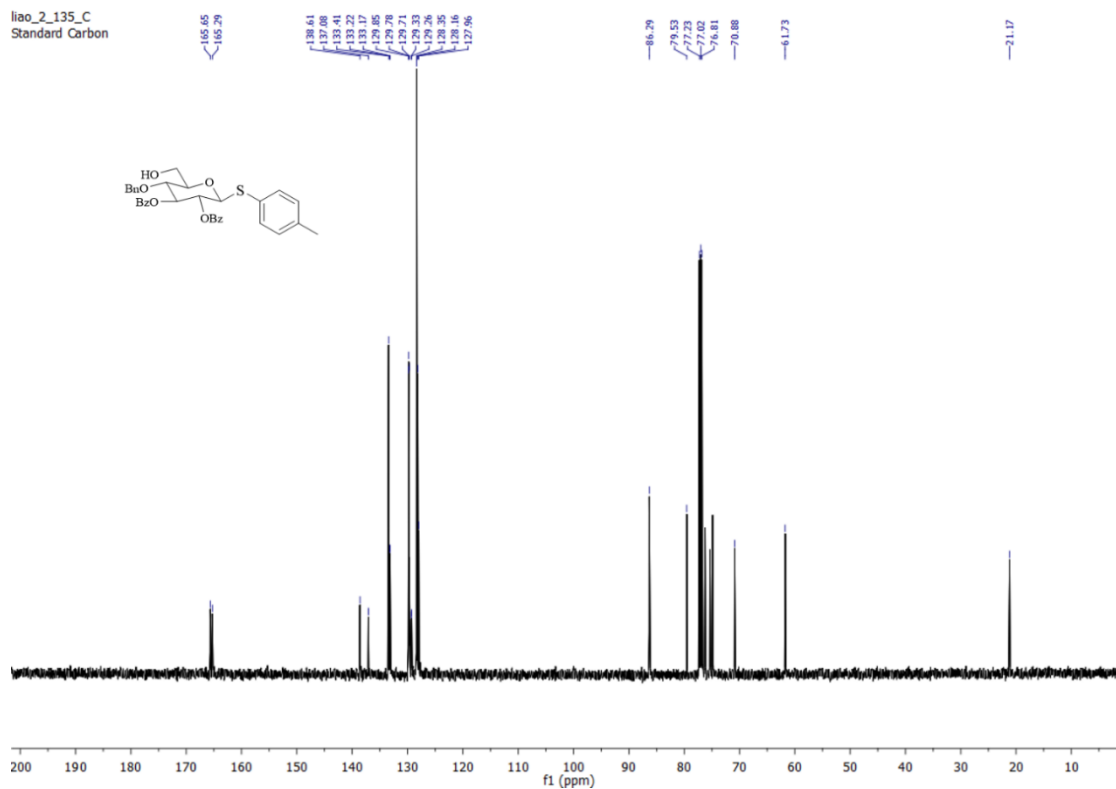

$^{13}\text{C}$  NMR Spectrum of compound **9** ( $\text{CDCl}_3$ , 600 MHz)

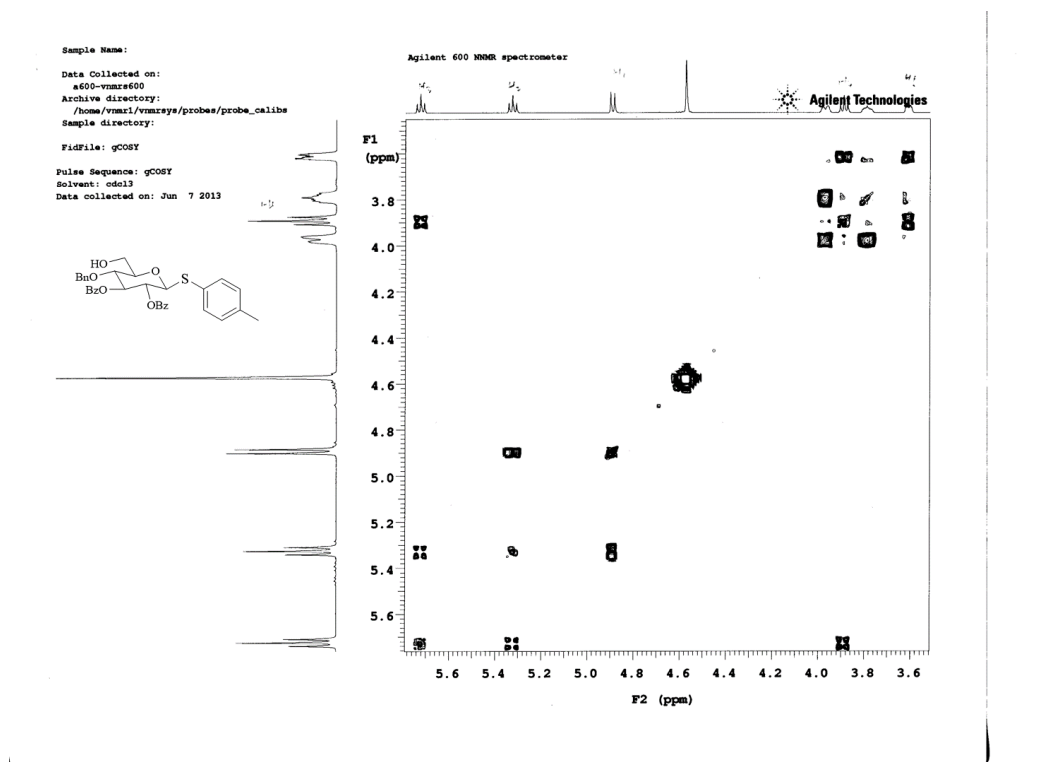

$^1\text{H}$ - $^1\text{H}$  COSY Spectrum of compound **9** ( $\text{CDCl}_3$ , 600 MHz)

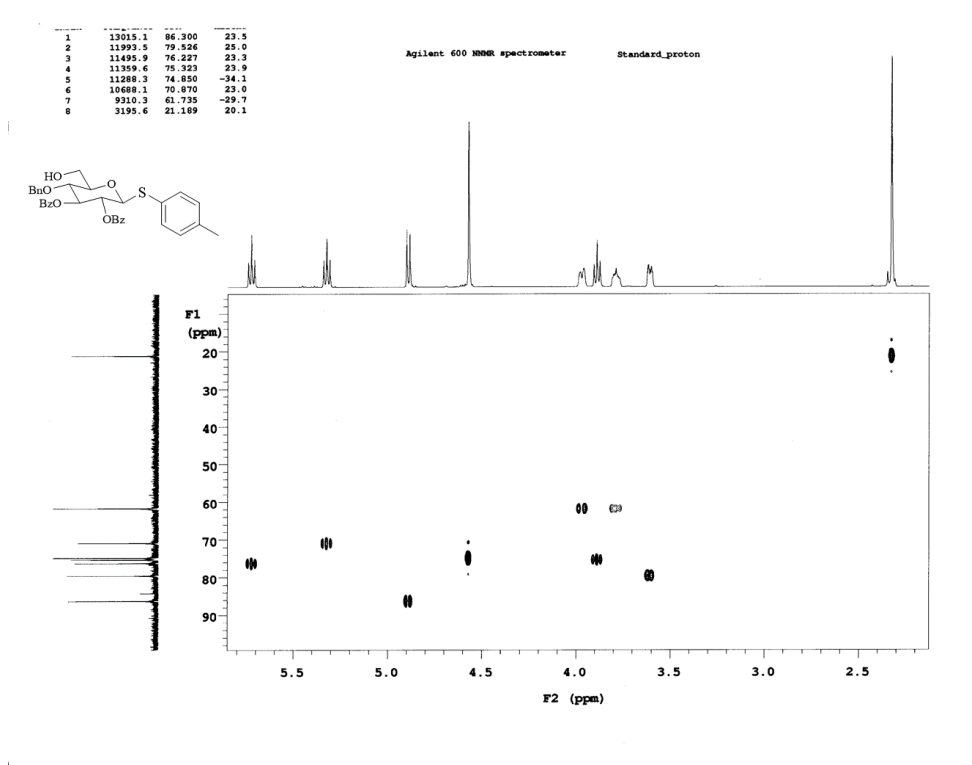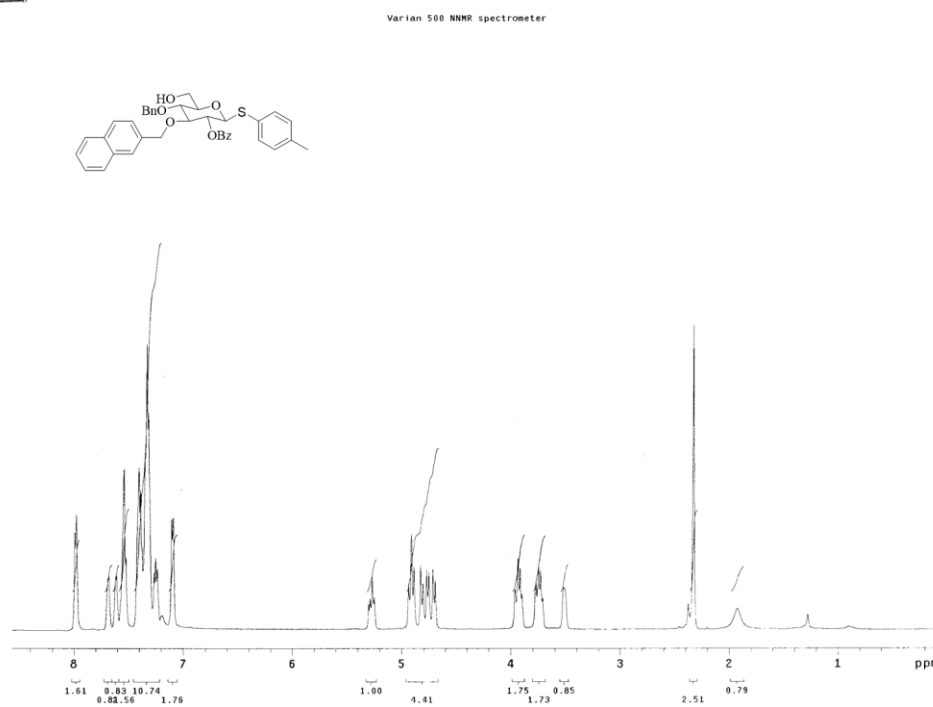

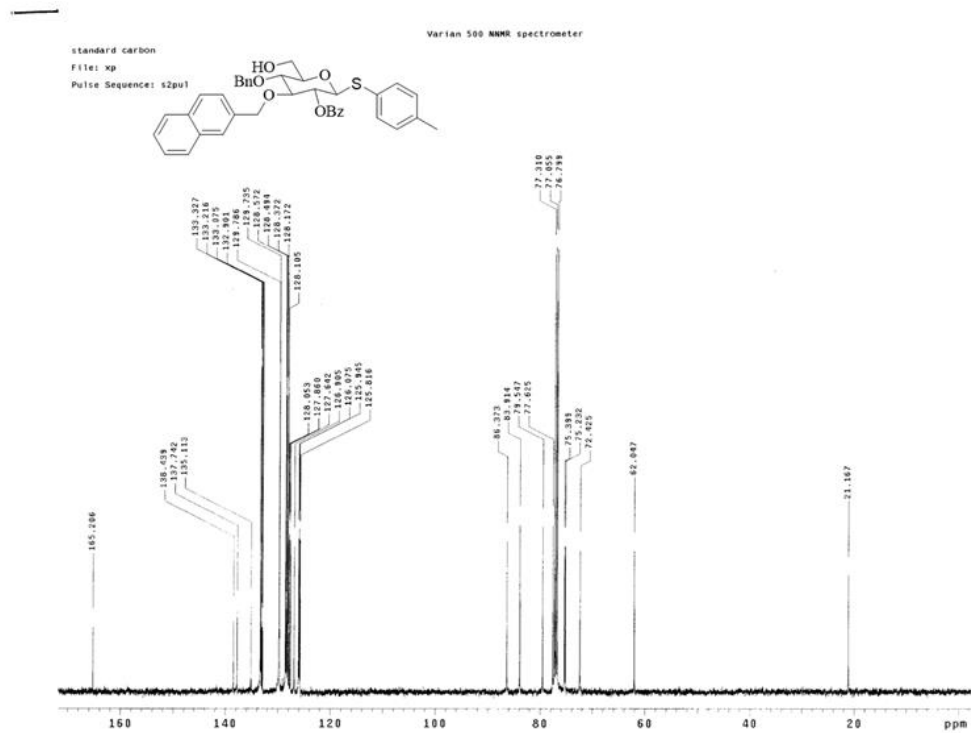

$^{13}\text{C}$  NMR Spectrum of compound **14** ( $\text{CDCl}_3$ , 500 MHz)

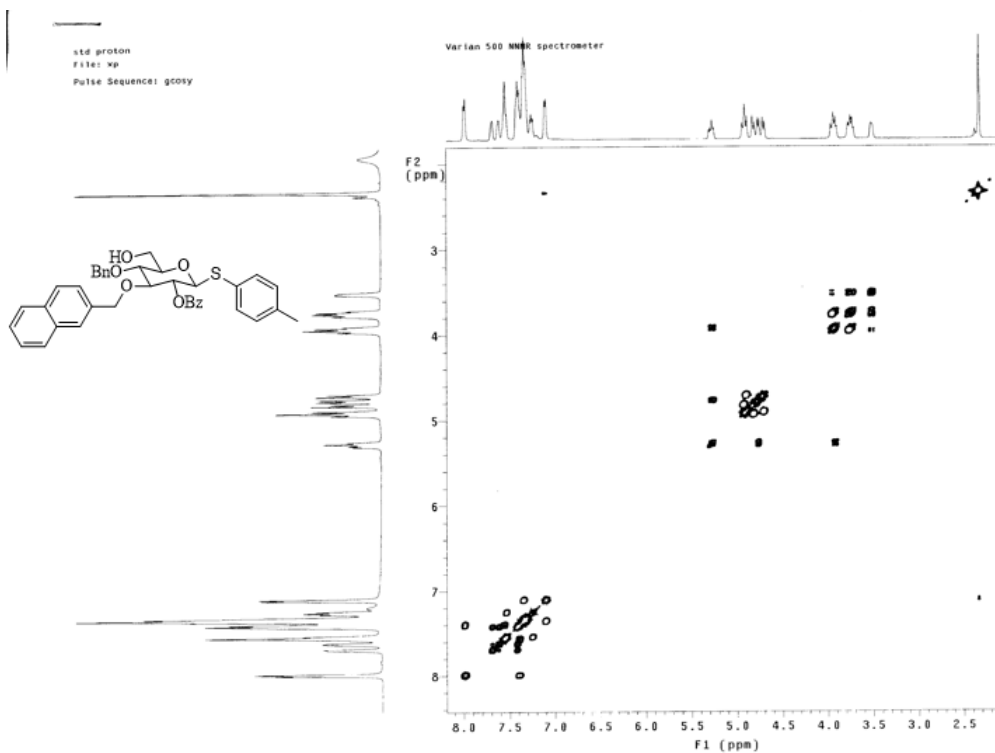

$^1\text{H}$ - $^1\text{H}$  COSY Spectrum of compound **14** ( $\text{CDCl}_3$ , 500 MHz)

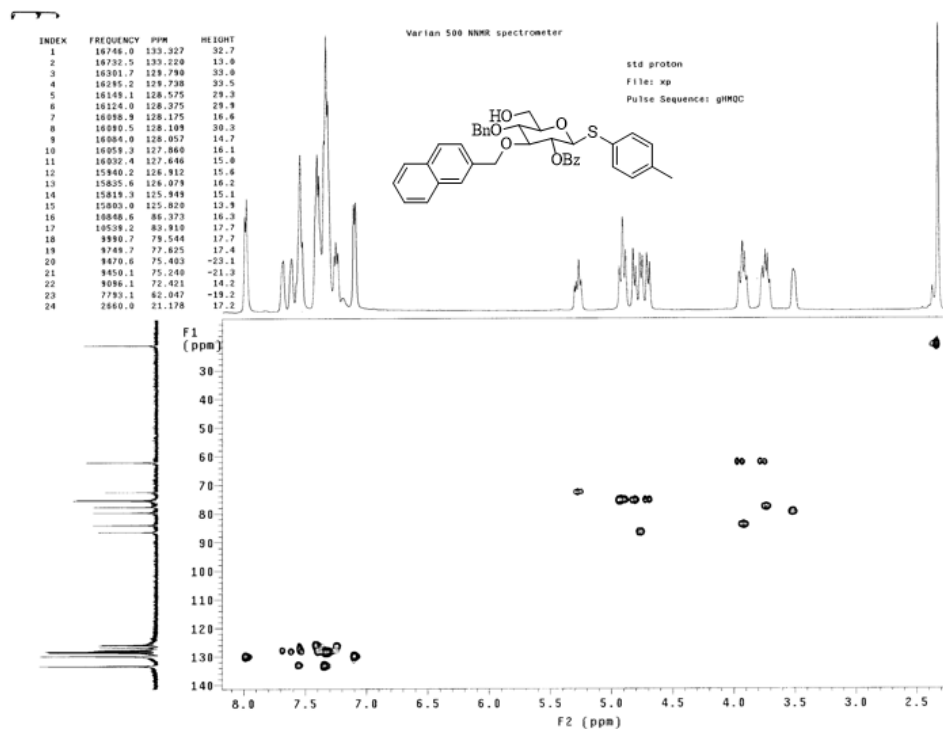

$^1\text{H}$ - $^{13}\text{C}$  HMQC Spectrum of compound **14** ( $\text{CDCl}_3$ , 500 MHz)

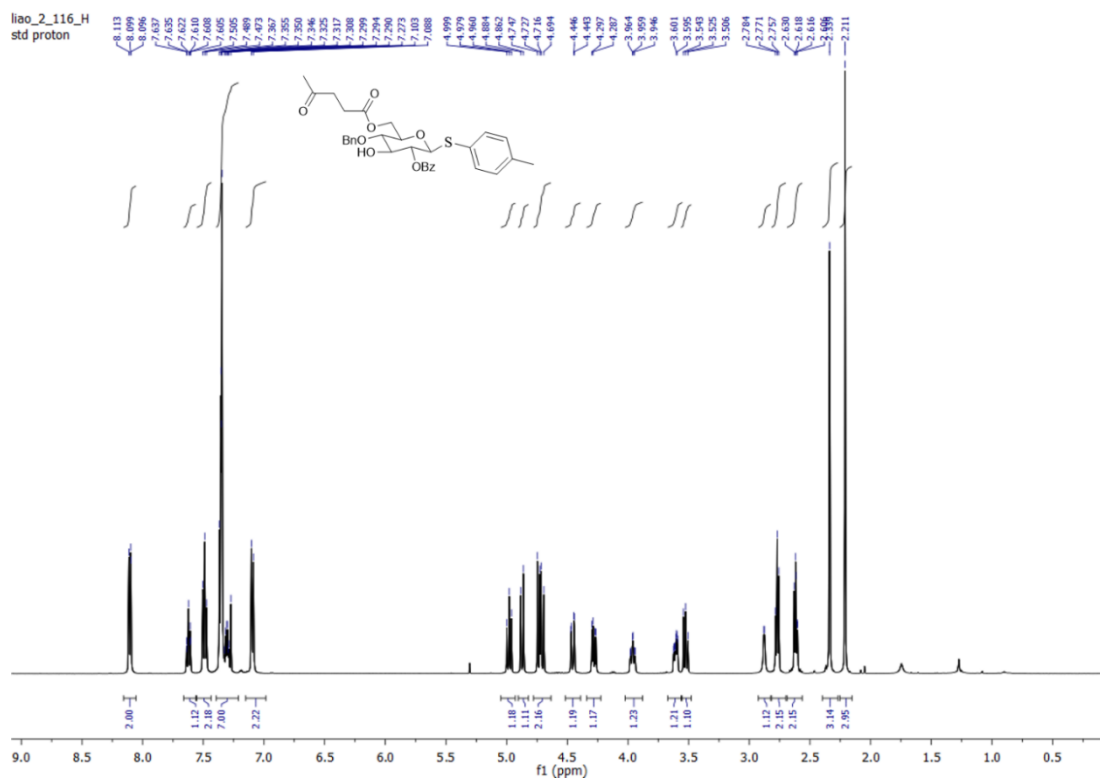

$^1\text{H}$  NMR Spectrum of compound **11** ( $\text{CDCl}_3$ , 500 MHz)

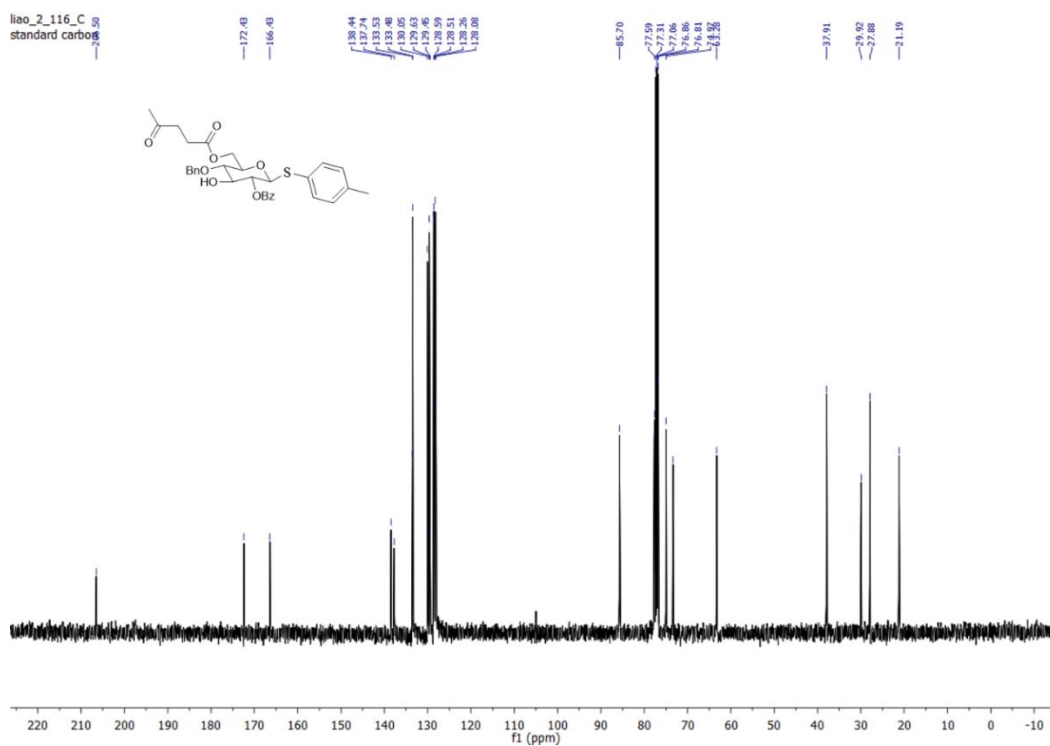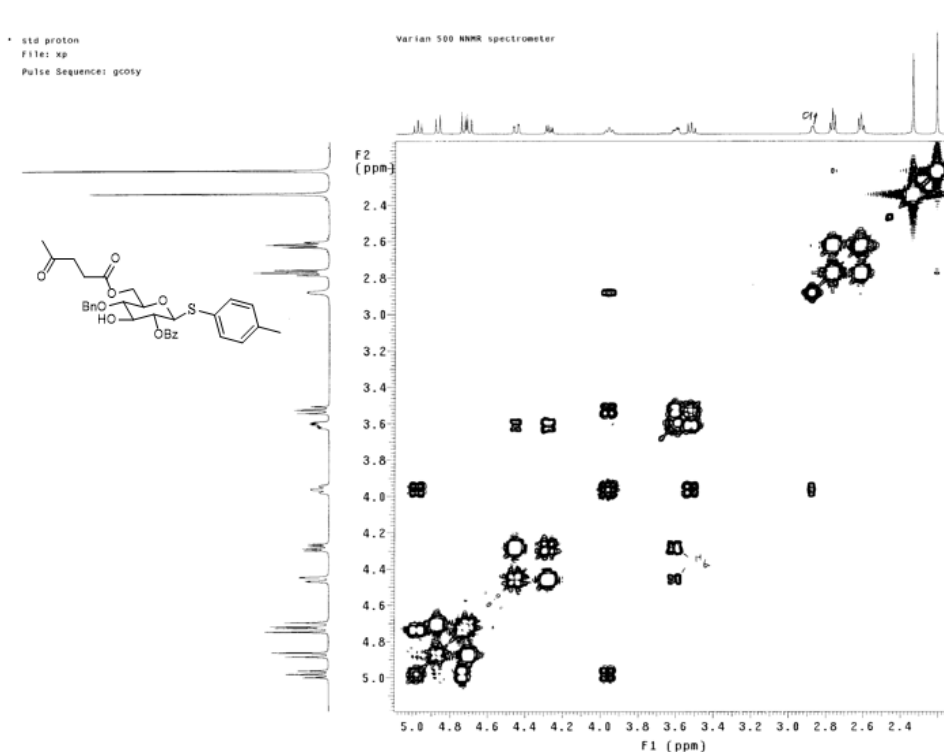

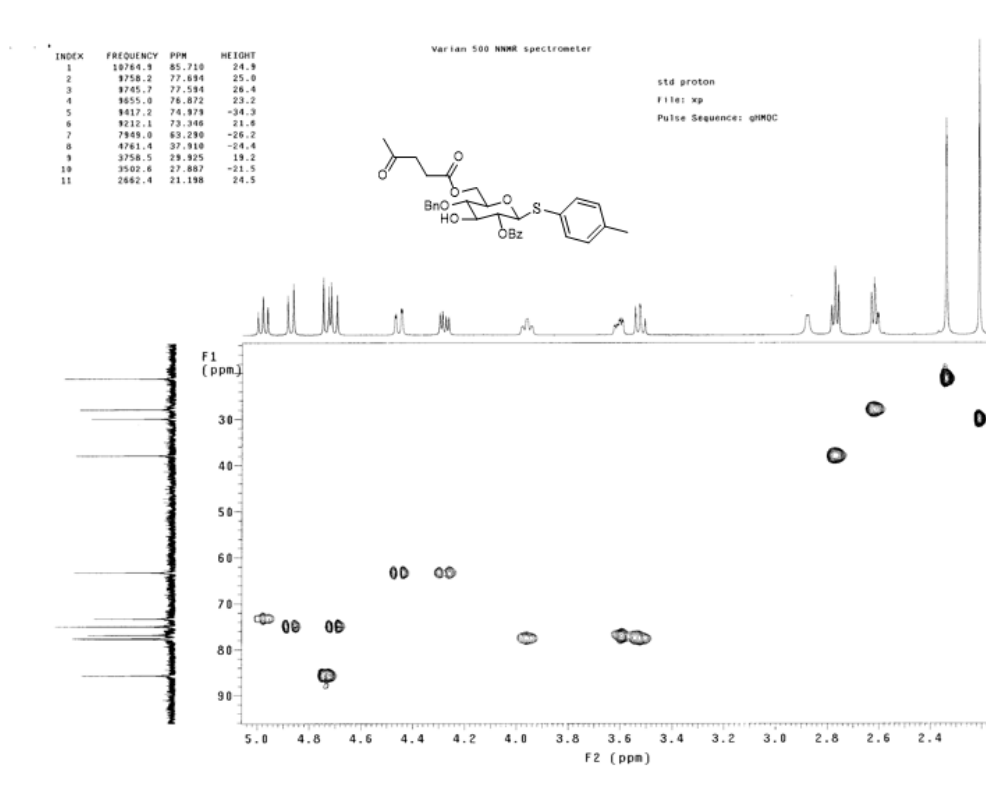

$^1\text{H}$ - $^{13}\text{C}$  HMQC Spectrum of compound **11** ( $\text{CDCl}_3$ , 500 MHz)

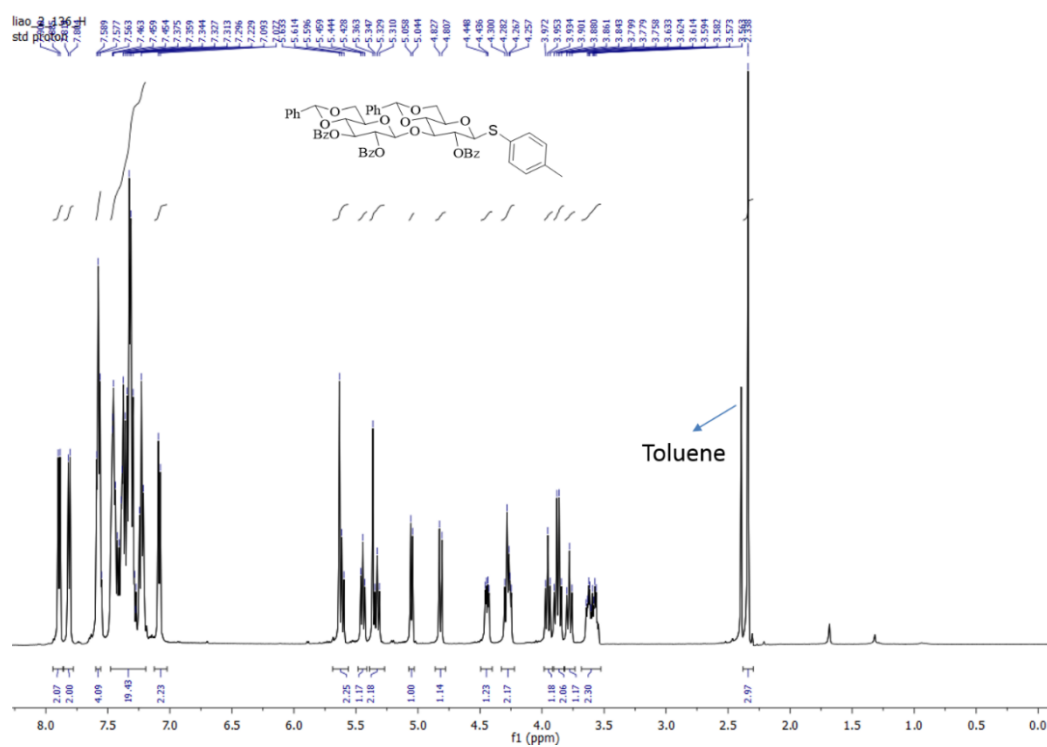

$^1\text{H}$  NMR Spectrum of compound **5** ( $\text{CDCl}_3$ , 500 MHz)

liao\_2\_136\_C  
standard carbon

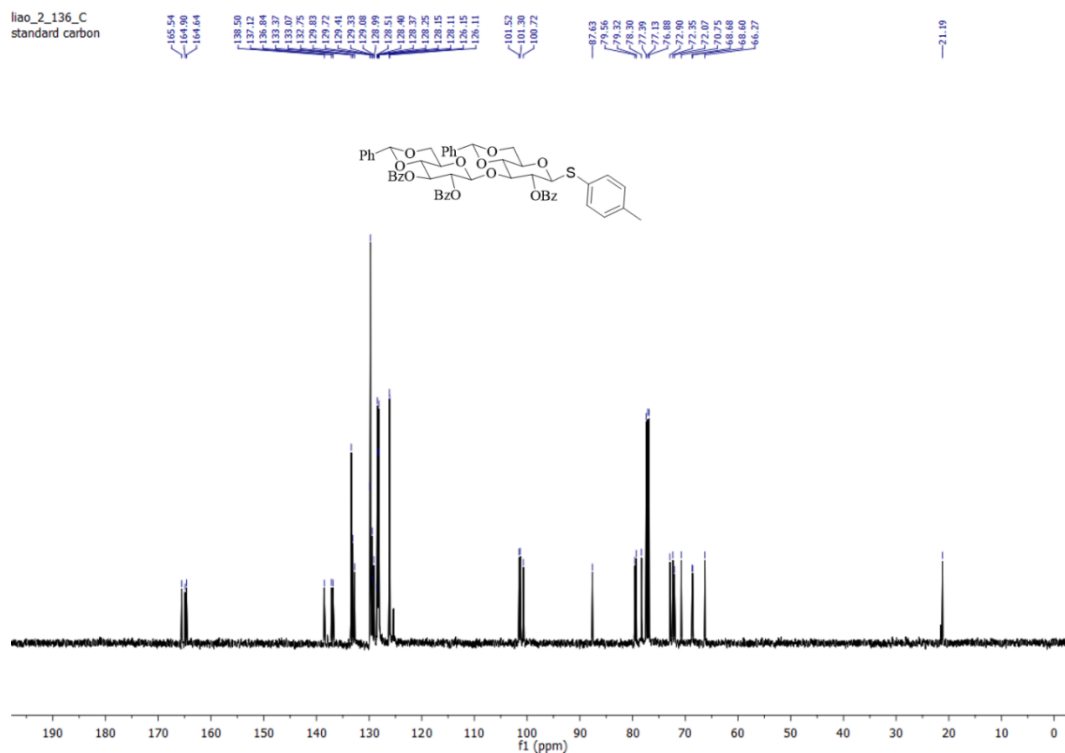

<sup>13</sup>C NMR Spectrum of compound **5** (CDCl<sub>3</sub>, 500 MHz)

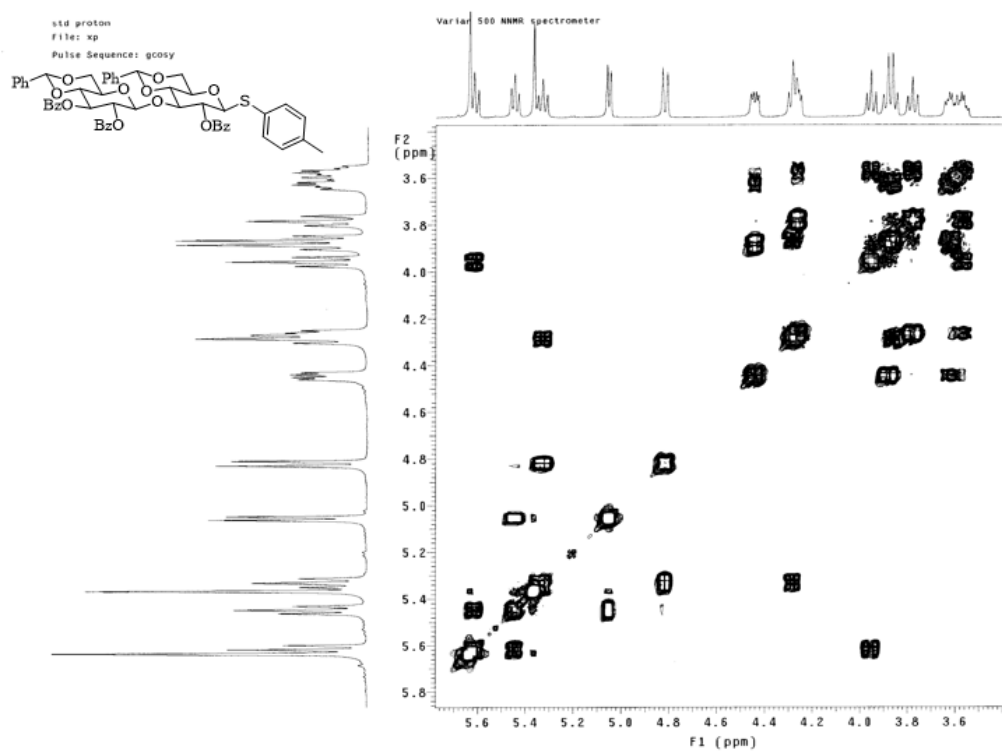

<sup>1</sup>H-<sup>1</sup>H COSY Spectrum of compound **5** (CDCl<sub>3</sub>, 500 MHz)

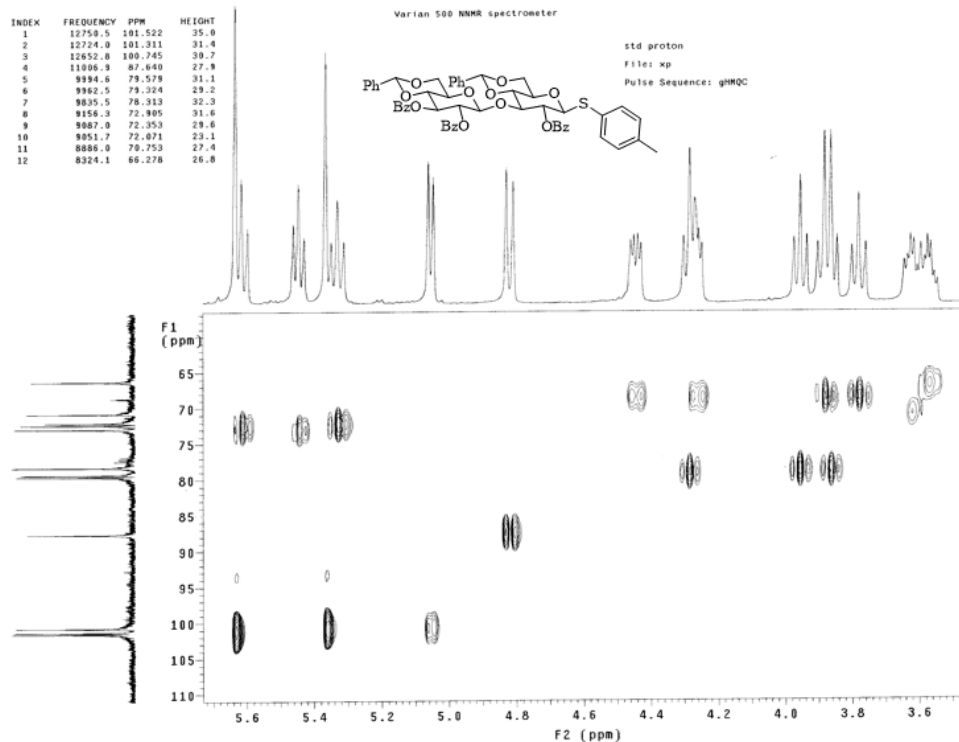

$^1\text{H}$ - $^{13}\text{C}$  HMQC Spectrum of compound **5** ( $\text{CDCl}_3$ , 500 MHz)

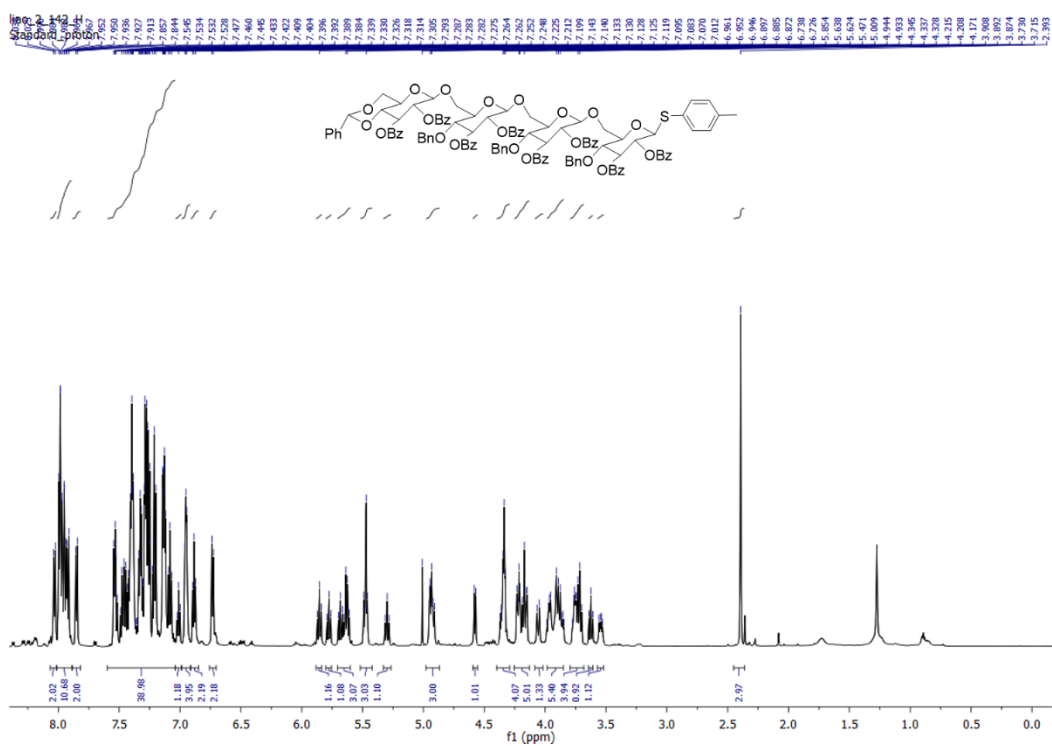

$^1\text{H}$  NMR Spectrum of compound **4** ( $\text{CDCl}_3$ , 600 MHz)

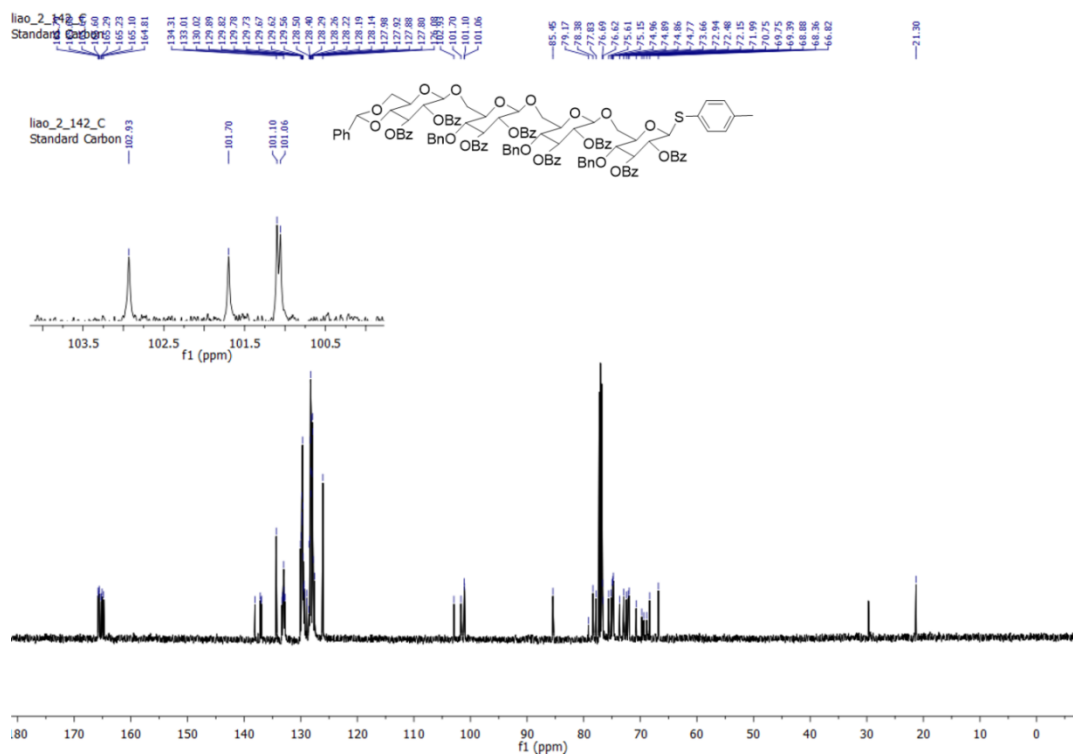

$^{13}\text{C}$  NMR Spectrum of compound **4** ( $\text{CDCl}_3$ , 600 MHz)

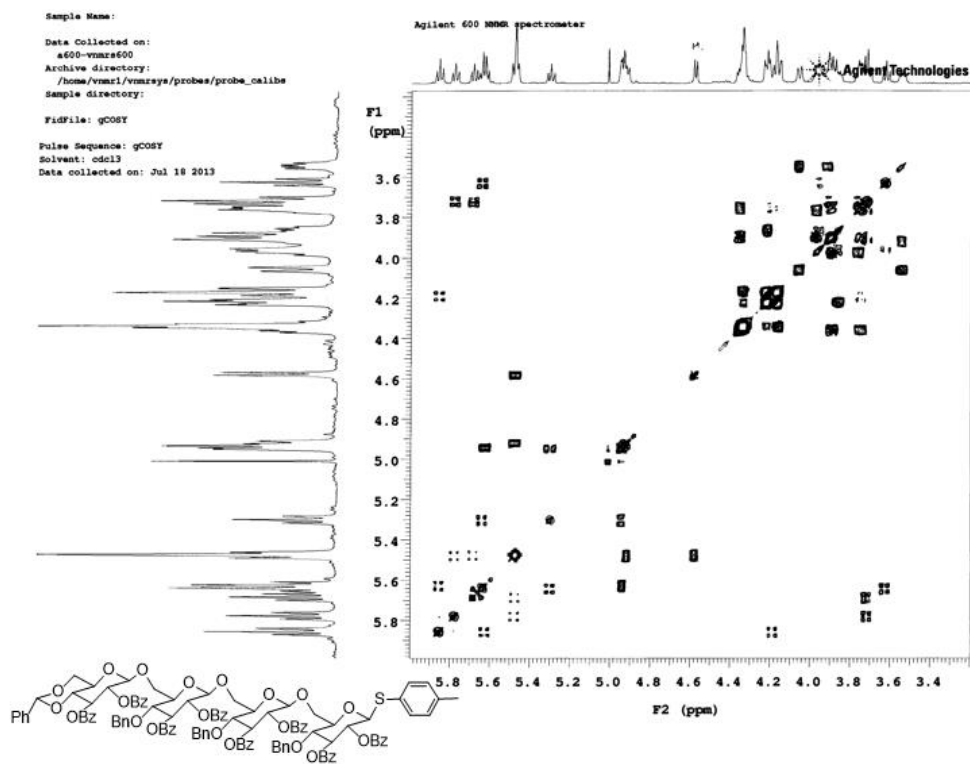

$^1\text{H}$ - $^1\text{H}$  COSY Spectrum of compound **4** ( $\text{CDCl}_3$ , 600 MHz)

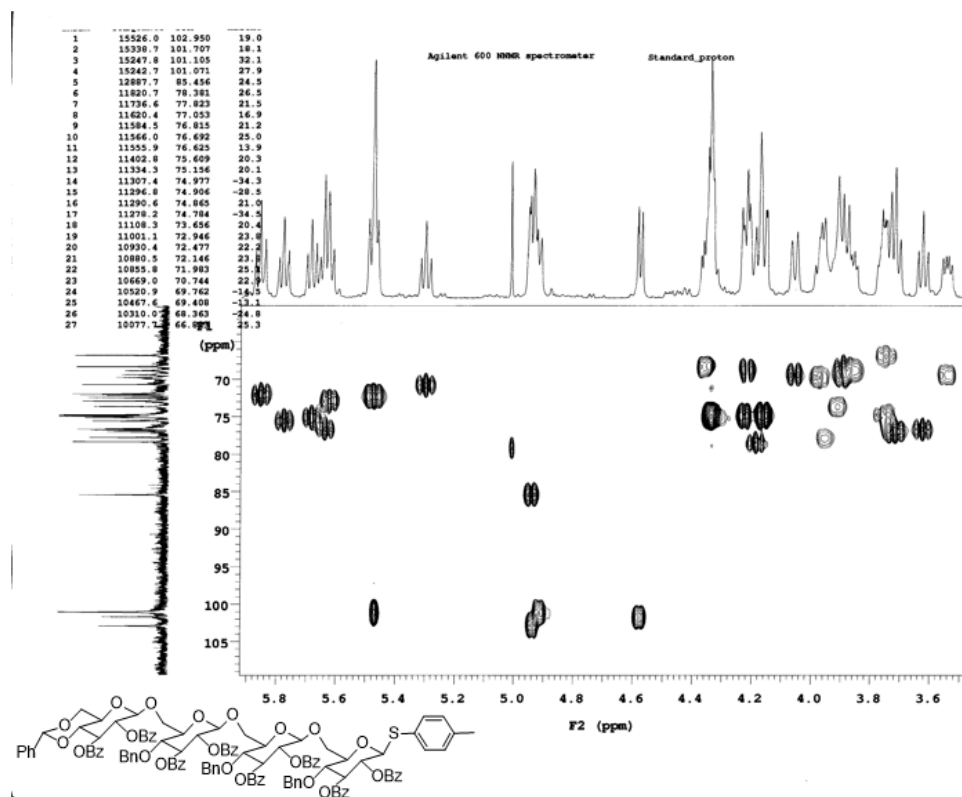

$^1\text{H}$ - $^{13}\text{C}$  HMQC Spectrum of compound **4** ( $\text{CDCl}_3$ , 600 MHz)

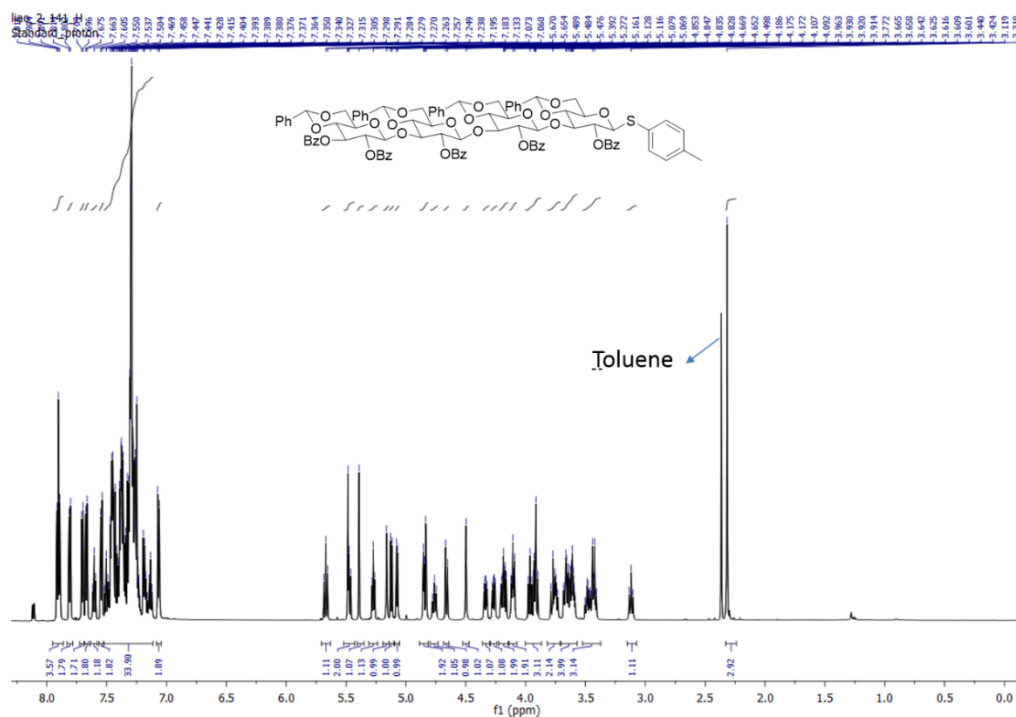

$^1\text{H}$  NMR Spectrum of compound **6** ( $\text{CDCl}_3$ , 600 MHz)

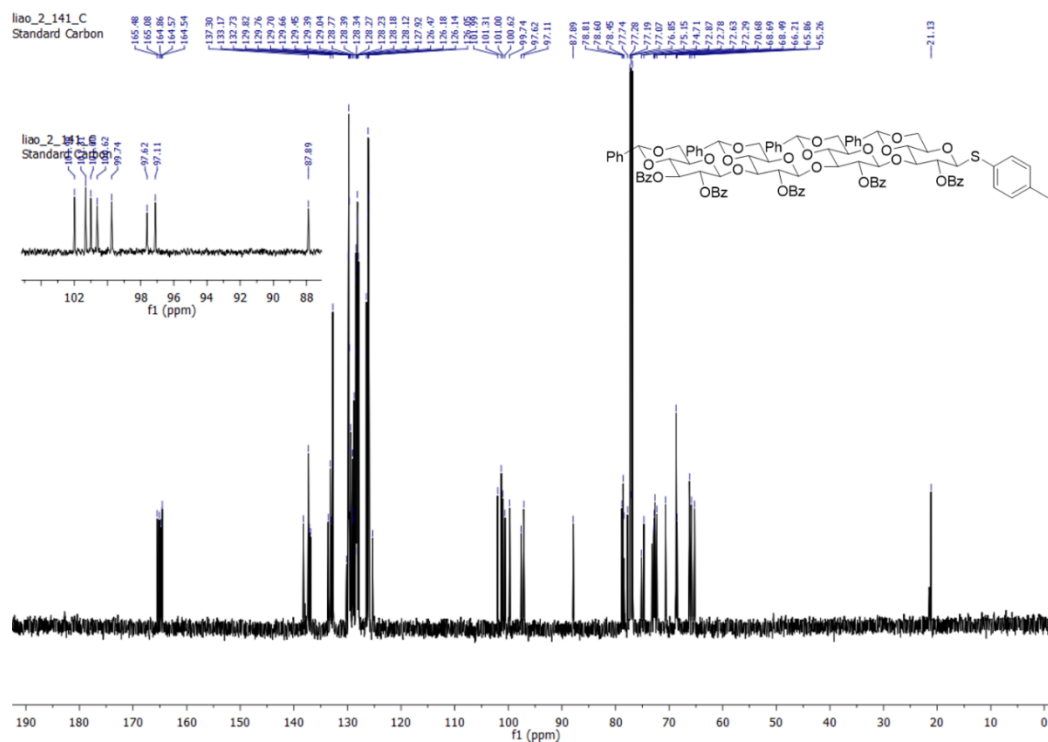

$^{13}\text{C}$  NMR Spectrum of compound **6** ( $\text{CDCl}_3$ , 600 MHz)

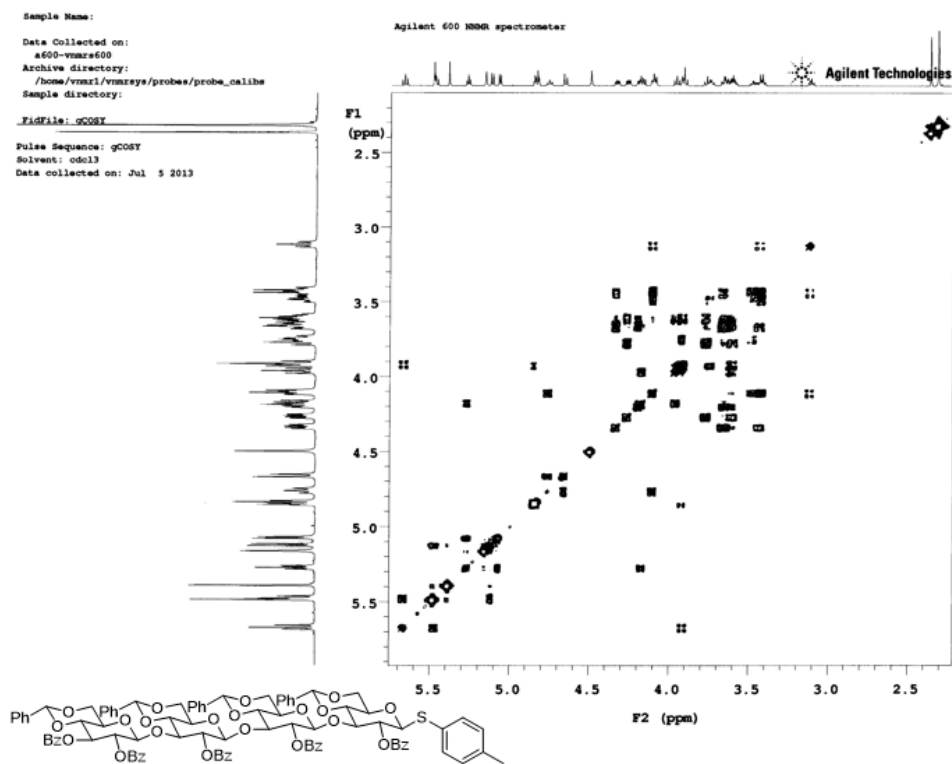

$^1\text{H}$ - $^1\text{H}$  COSY Spectrum of compound **6** ( $\text{CDCl}_3$ , 600 MHz)

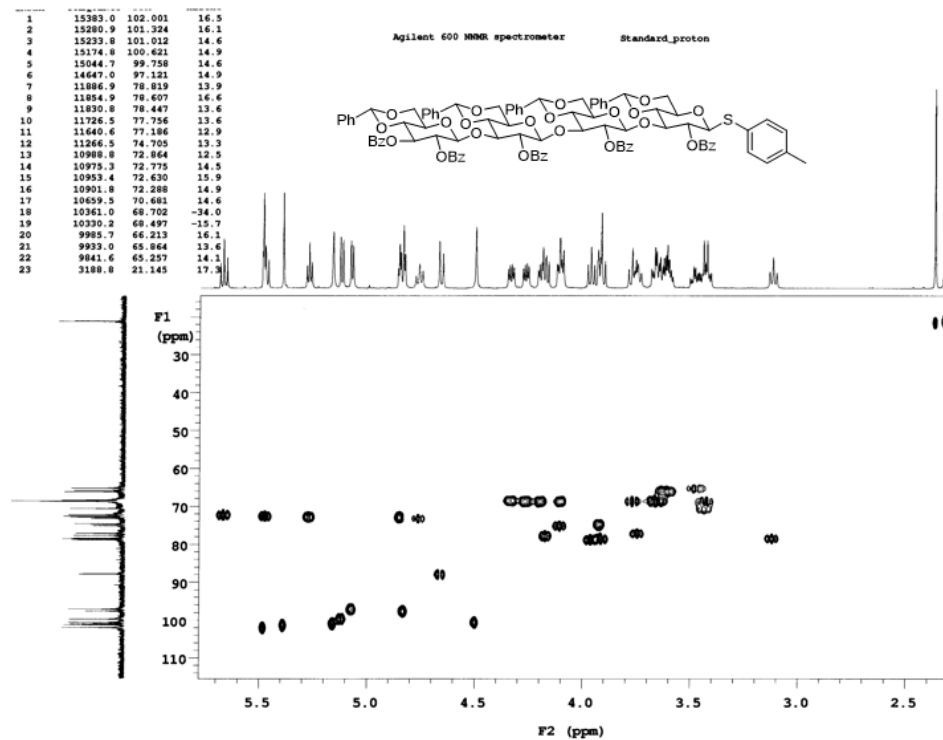

$^1\text{H}$ - $^{13}\text{C}$  HMQC Spectrum of compound **6** ( $\text{CDCl}_3$ , 600 MHz)

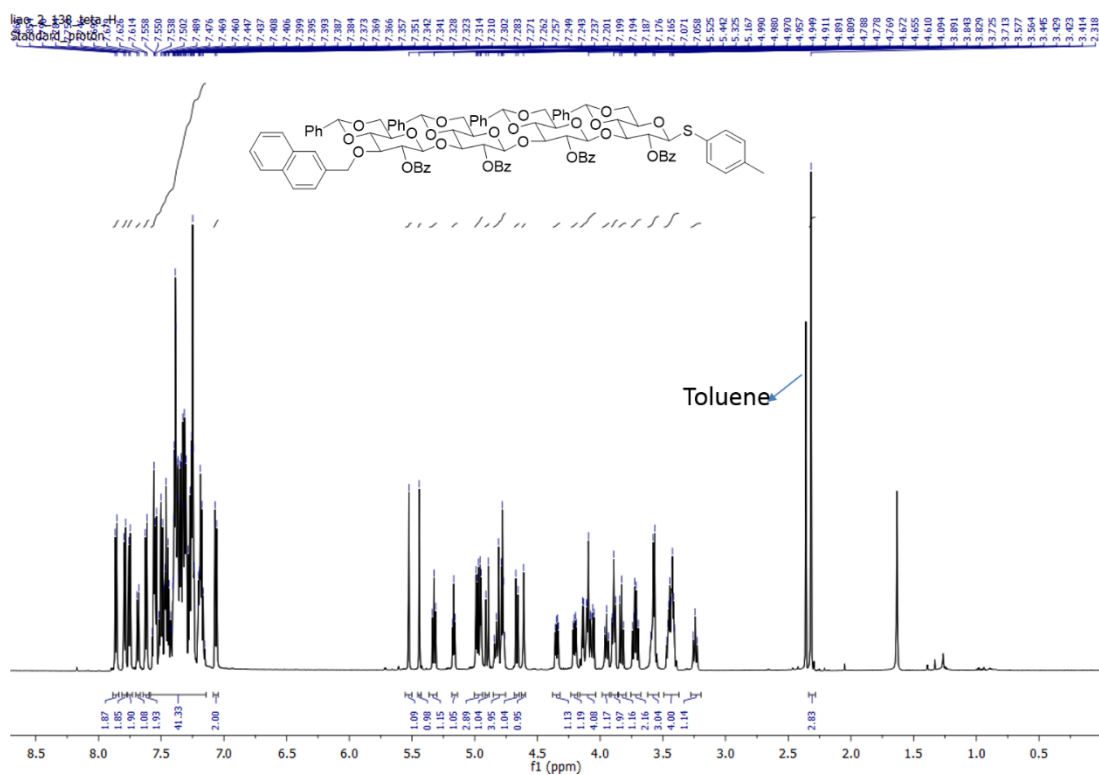

$^1\text{H}$  NMR Spectrum of compound **15** ( $\text{CDCl}_3$ , 600 MHz)

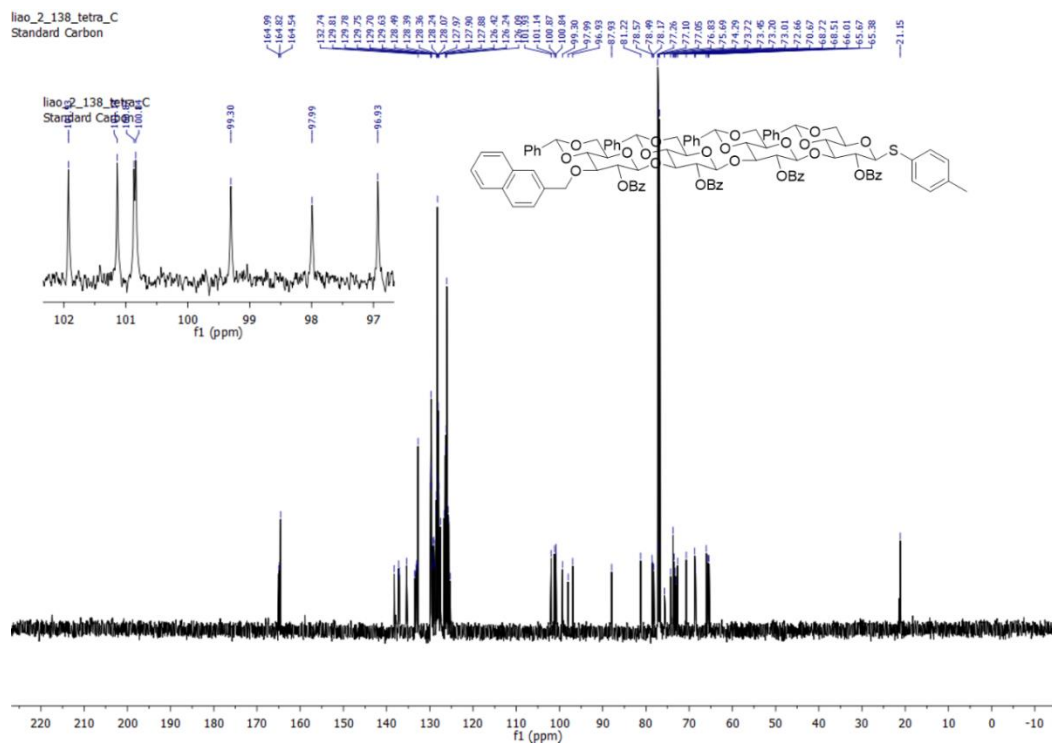

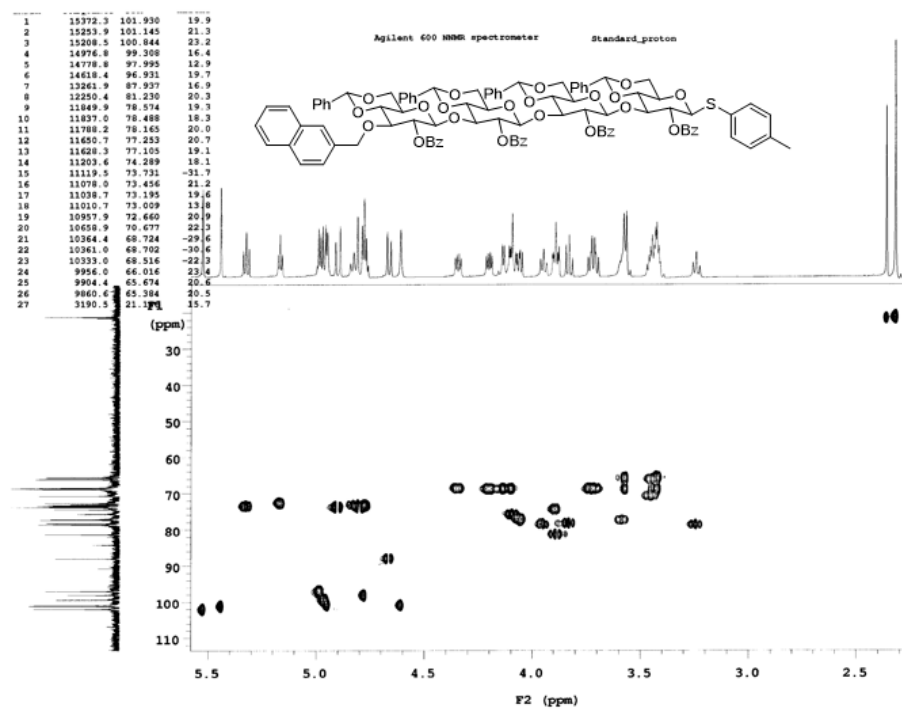

$^1\text{H}$ - $^{13}\text{C}$  HMQC Spectrum of compound **15** ( $\text{CDCl}_3$ , 600 MHz)

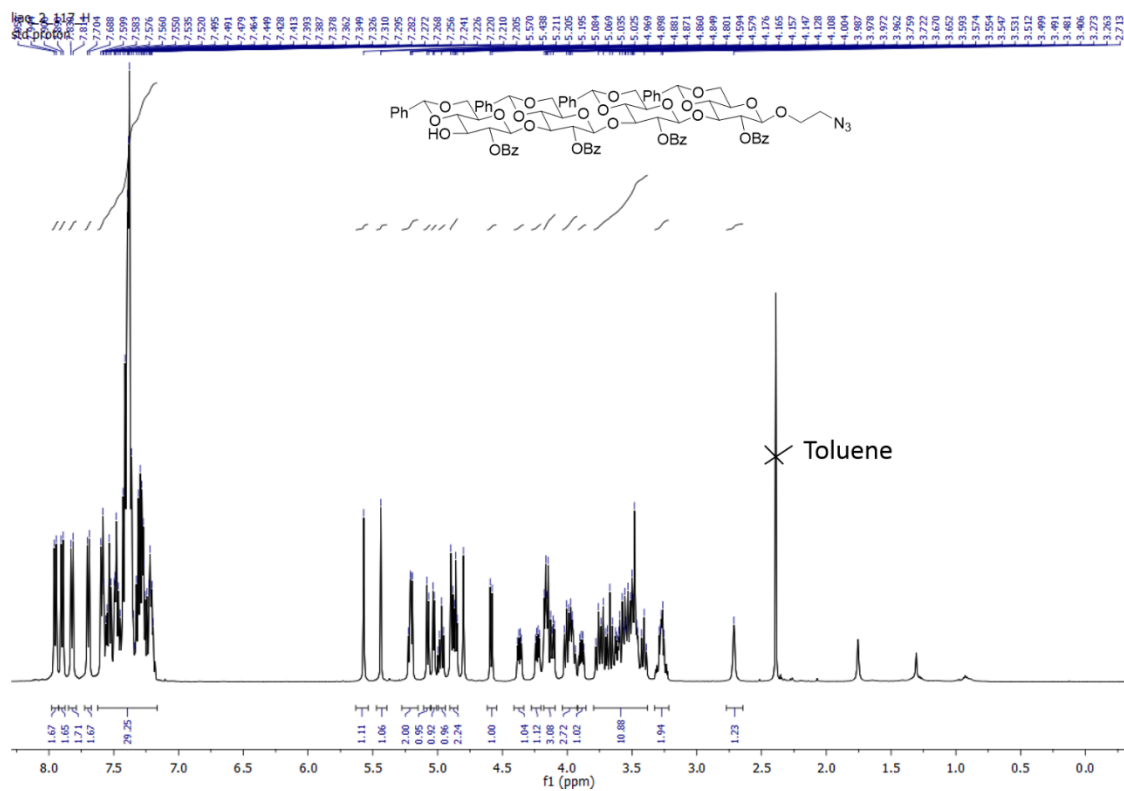

$^1\text{H}$  NMR Spectrum of compound **12** ( $\text{CDCl}_3$ , 600 MHz)

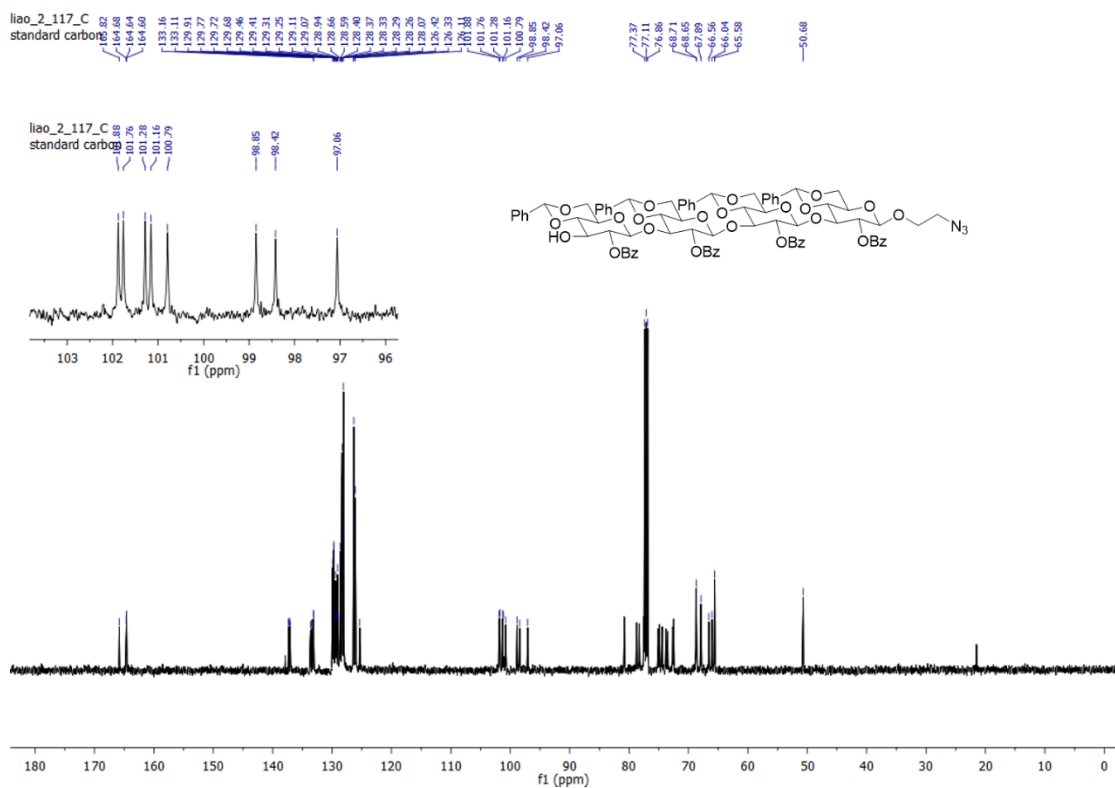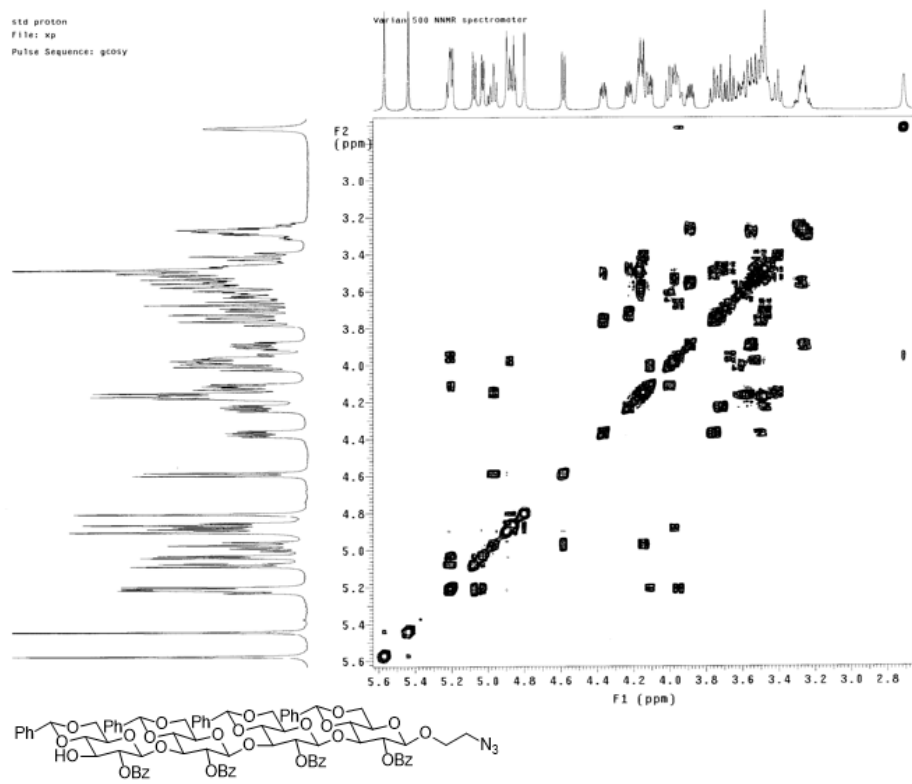

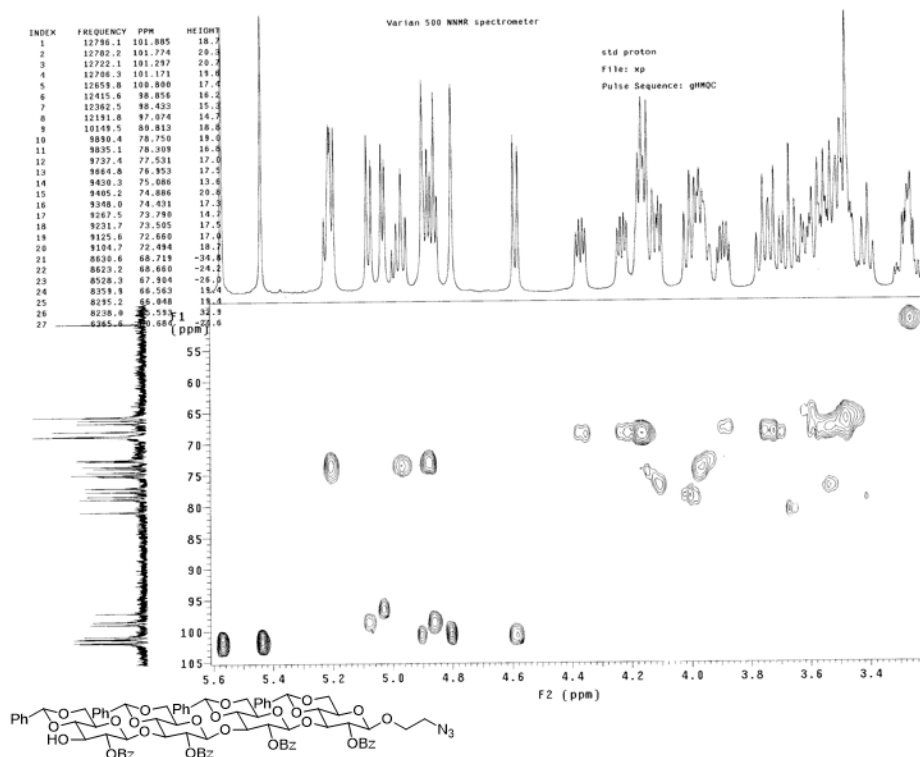

$^1\text{H}$ - $^{13}\text{C}$  HMQC Spectrum of compound **12** ( $\text{CDCl}_3$ , 600 MHz)

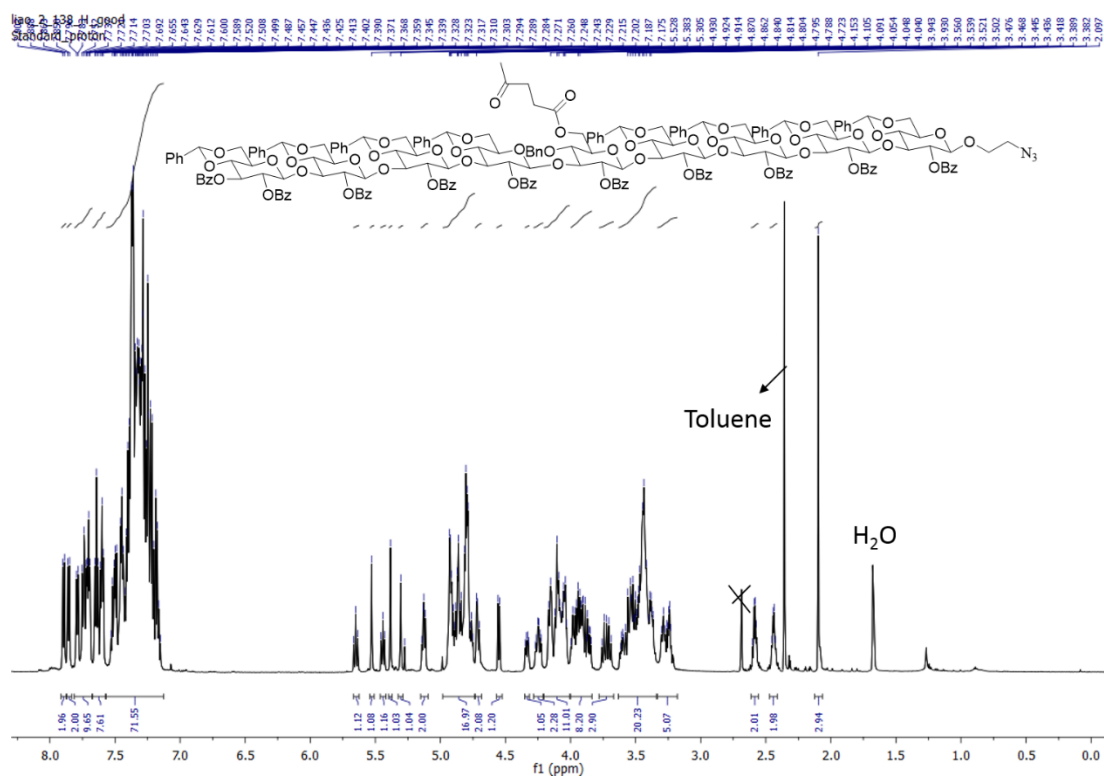

$^1\text{H}$  NMR Spectrum of compound **16** ( $\text{CDCl}_3$ , 600 MHz)

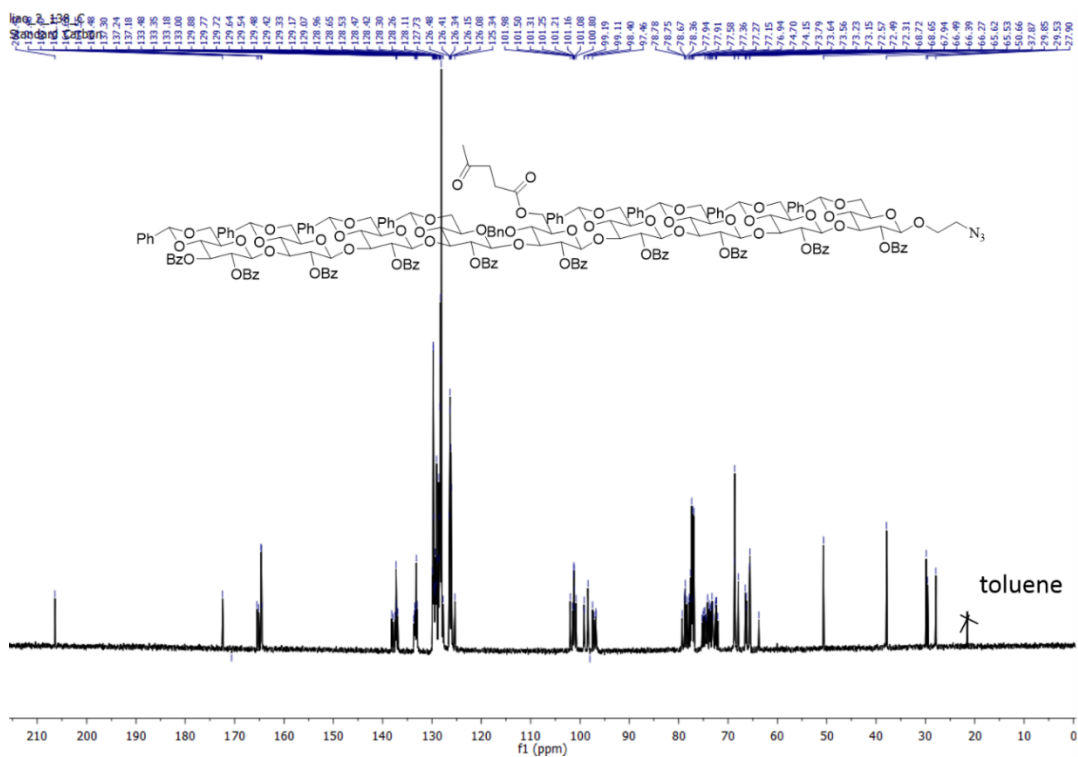

$^{13}\text{C}$  NMR Spectrum of compound **16** ( $\text{CDCl}_3$ , 600 MHz)

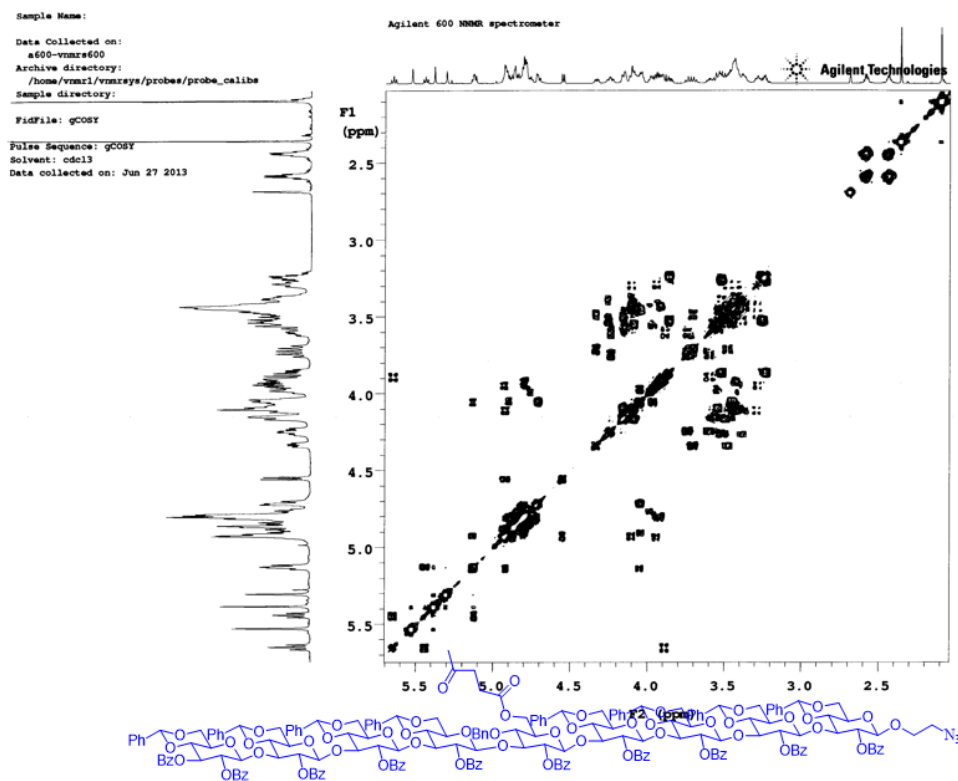

$^1\text{H}$ - $^1\text{H}$  COSY Spectrum of compound **16** ( $\text{CDCl}_3$ , 600 MHz)

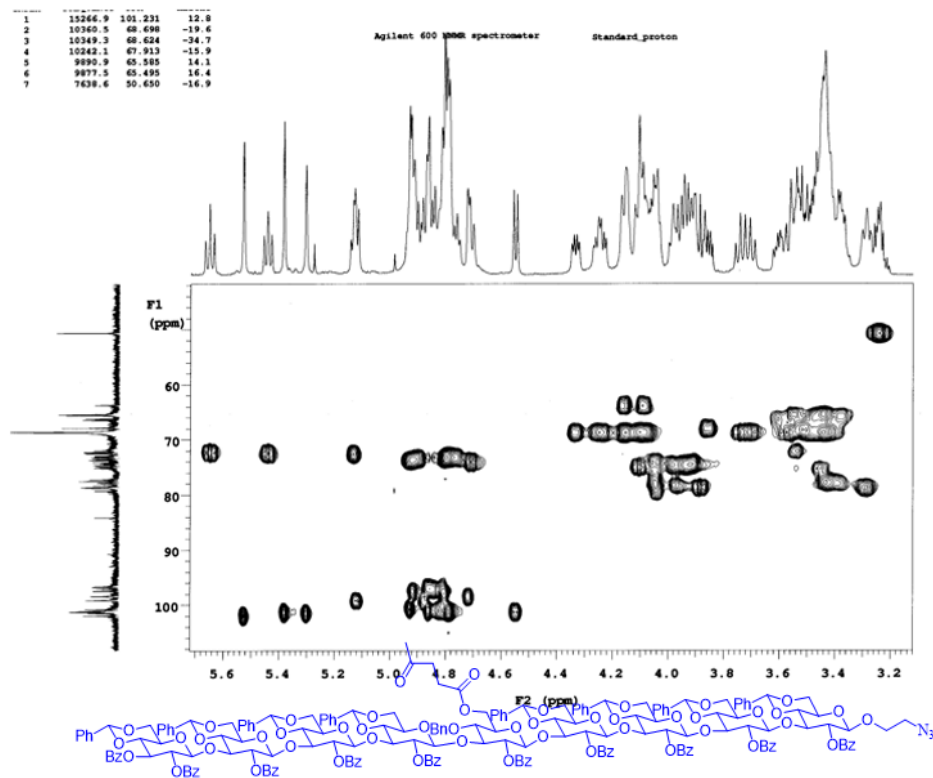

$^1\text{H}$ - $^{13}\text{C}$  HMQC Spectrum of compound **16** ( $\text{CDCl}_3$ , 600 MHz)

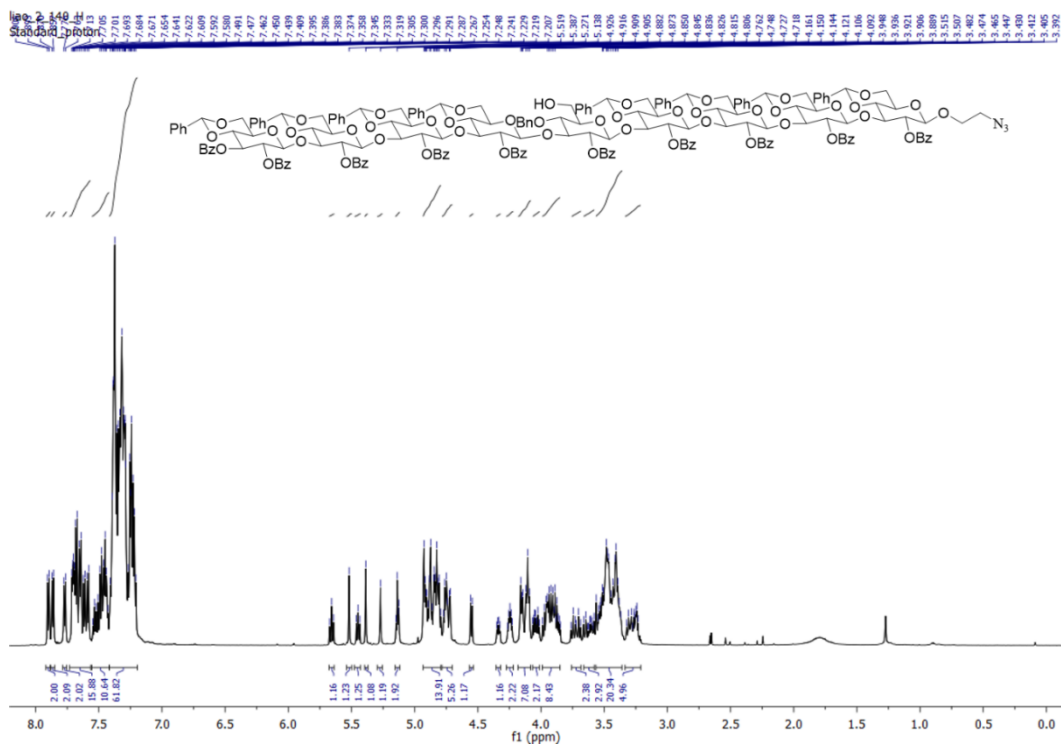

$^1\text{H}$  NMR Spectrum of compound **7** ( $\text{CDCl}_3$ , 600 MHz)

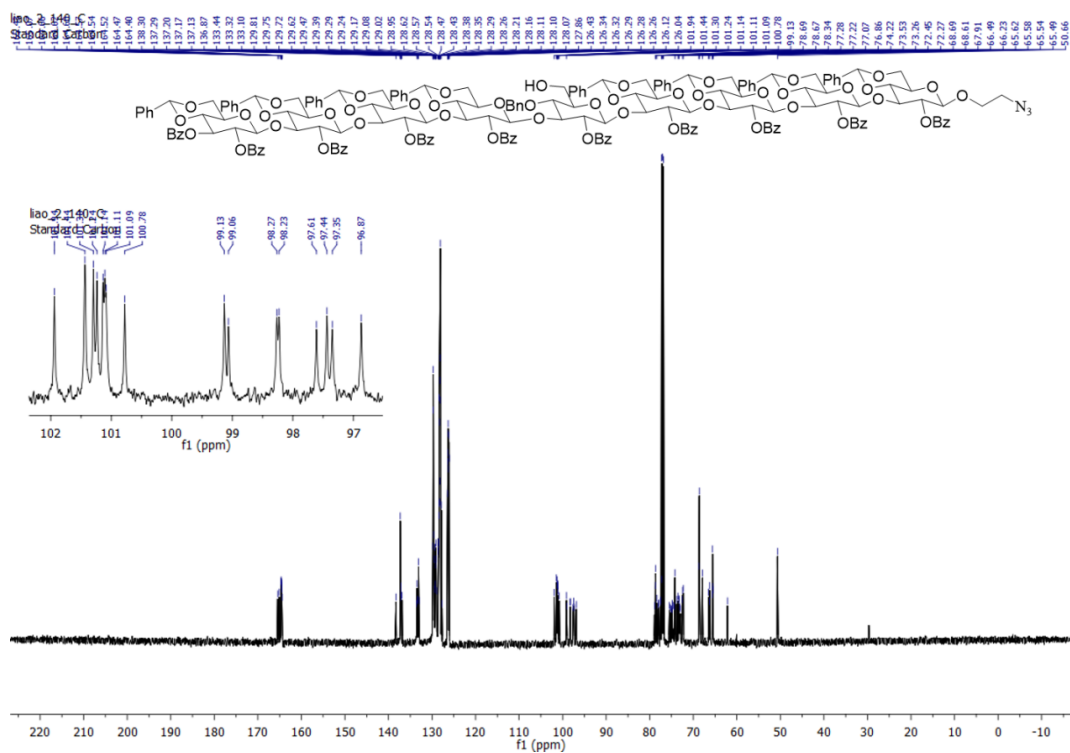

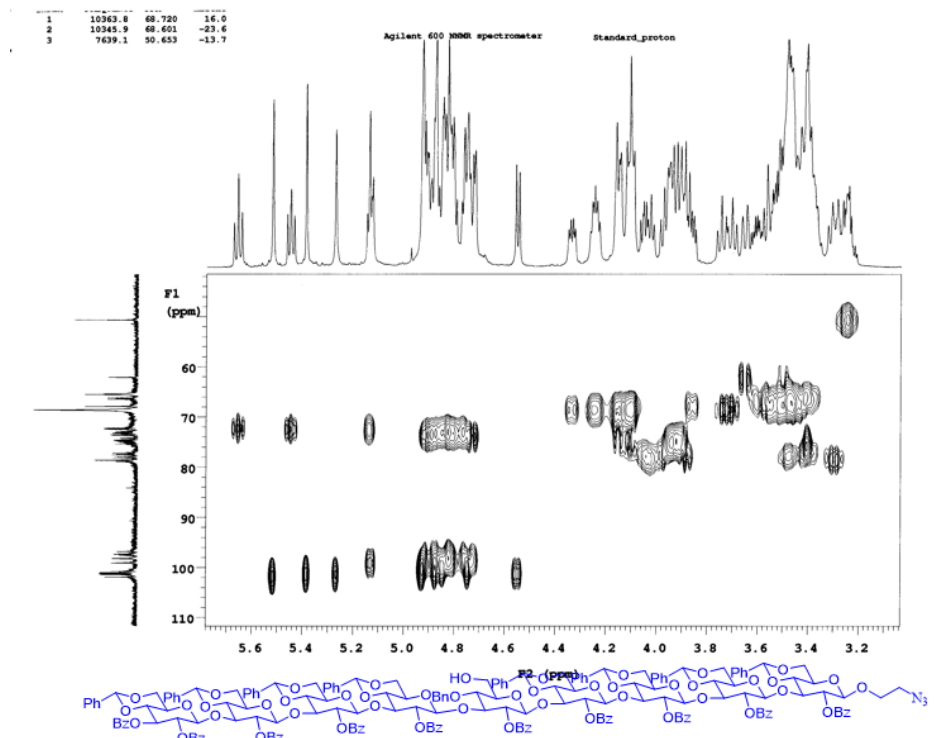

$^1\text{H}$ - $^{13}\text{C}$  HMQC Spectrum of compound **7** ( $\text{CDCl}_3$ , 600 MHz)

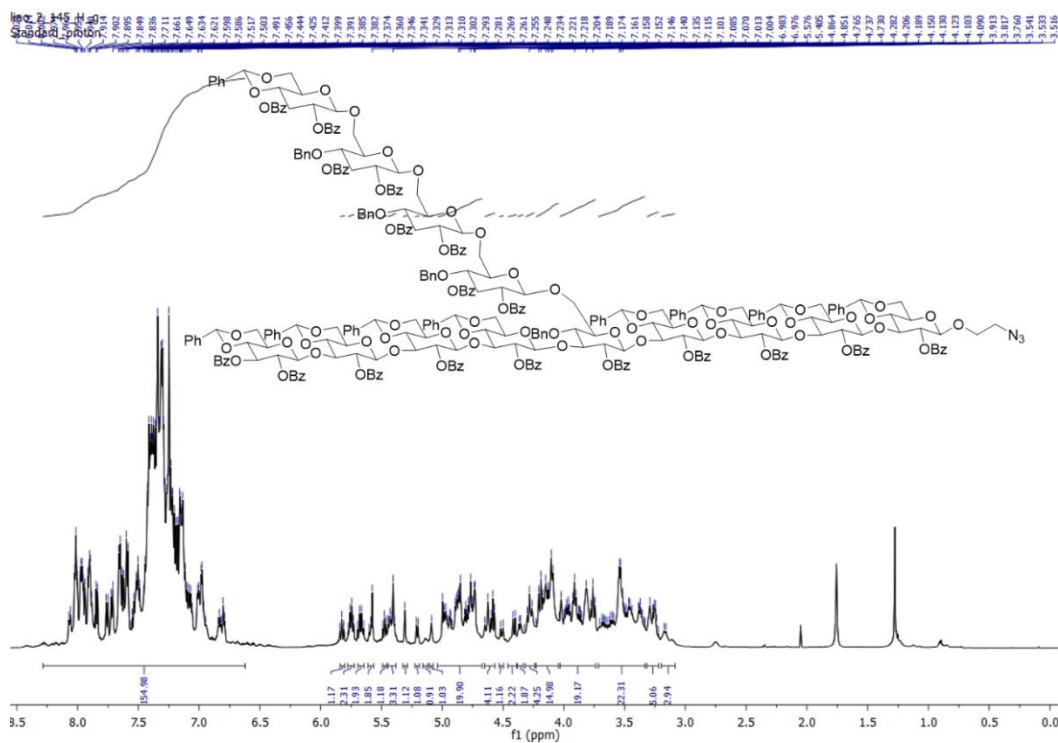

$^1\text{H}$  NMR Spectrum of compound **17** ( $\text{CDCl}_3$ , 600 MHz)

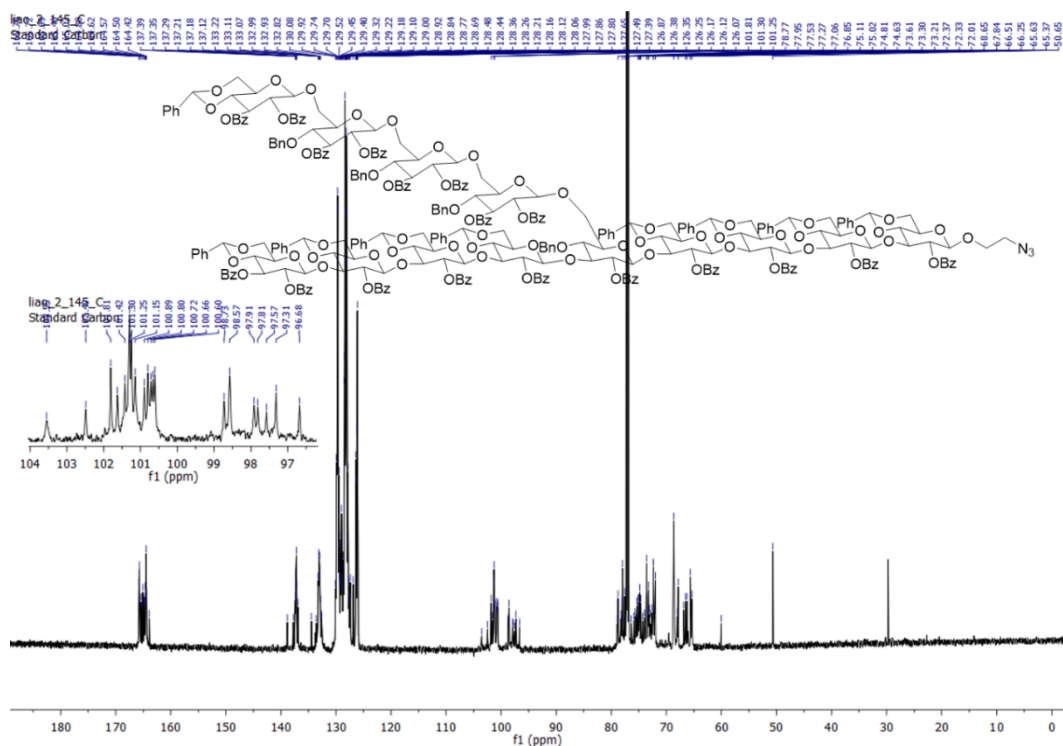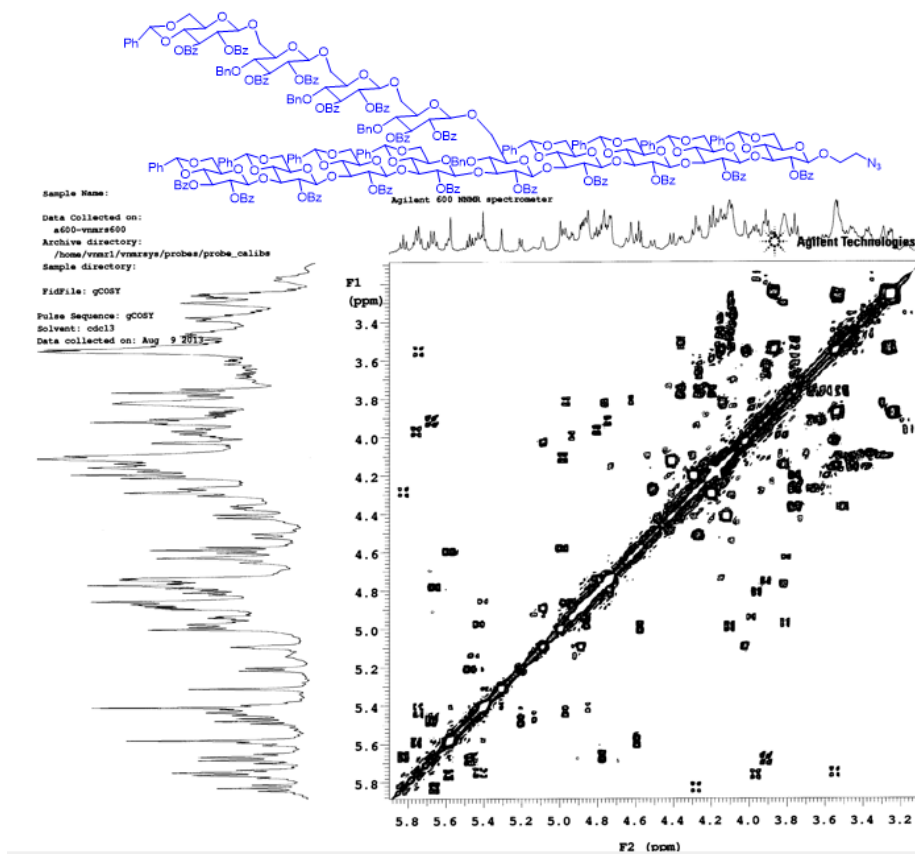

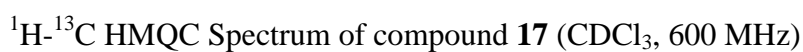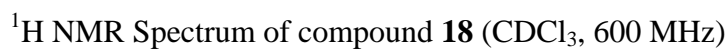

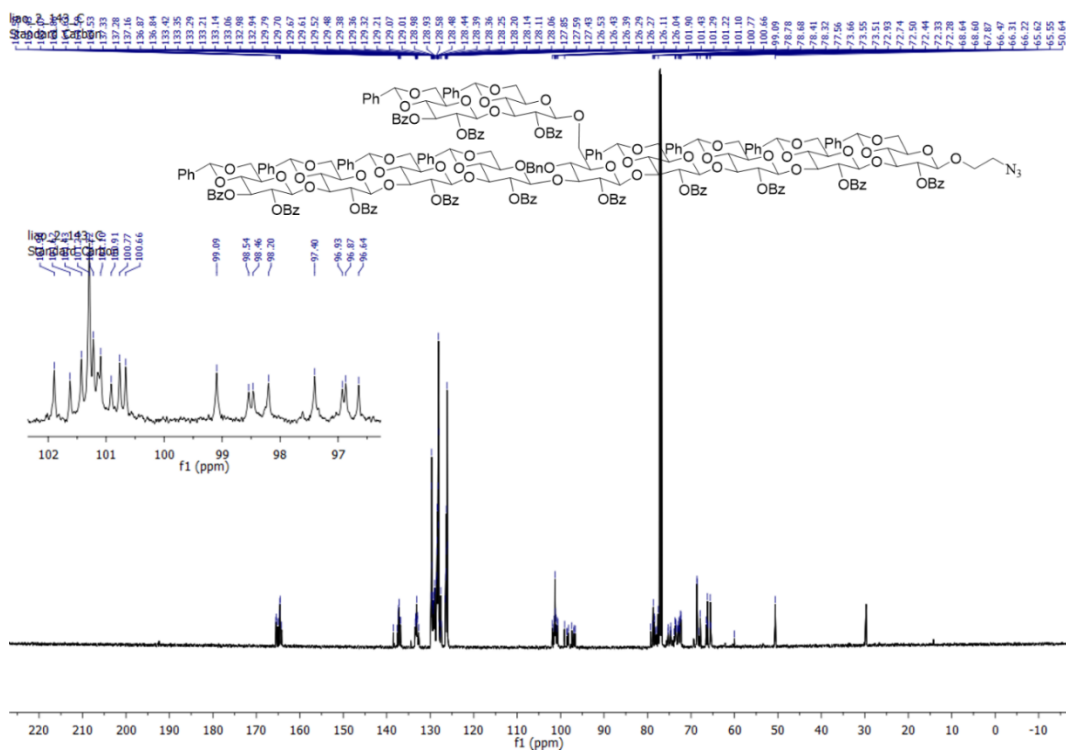

$^{13}\text{C}$  NMR Spectrum of compound **18** ( $\text{CDCl}_3$ , 600 MHz)

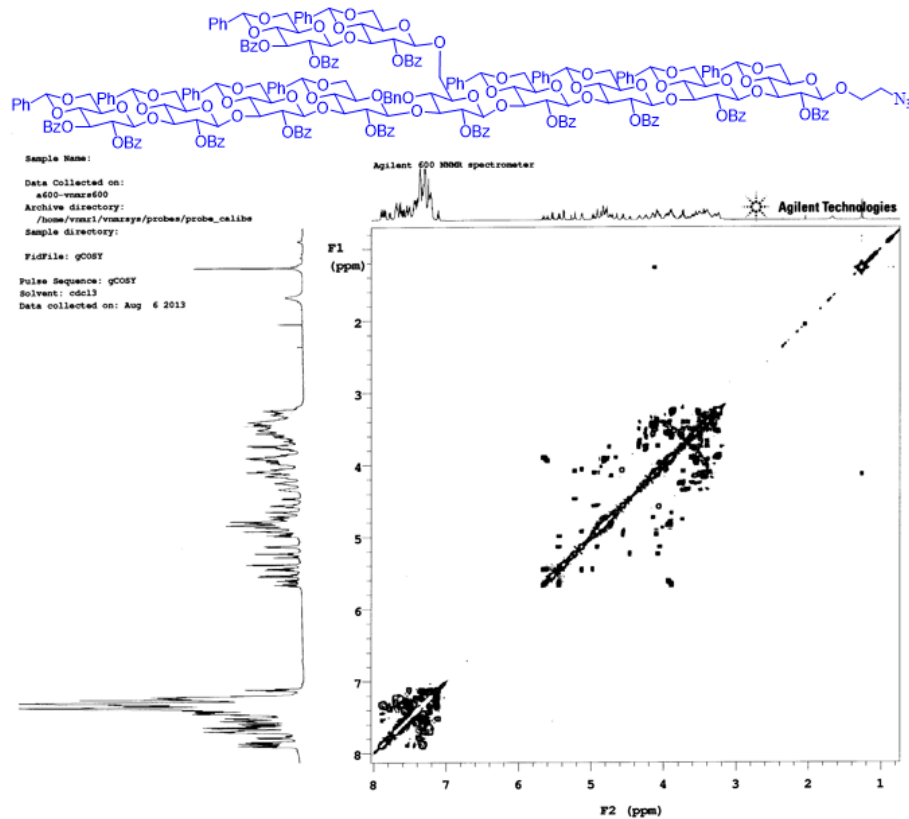

$^1\text{H}$ - $^1\text{H}$  COSY Spectrum of compound **18** ( $\text{CDCl}_3$ , 600 MHz)

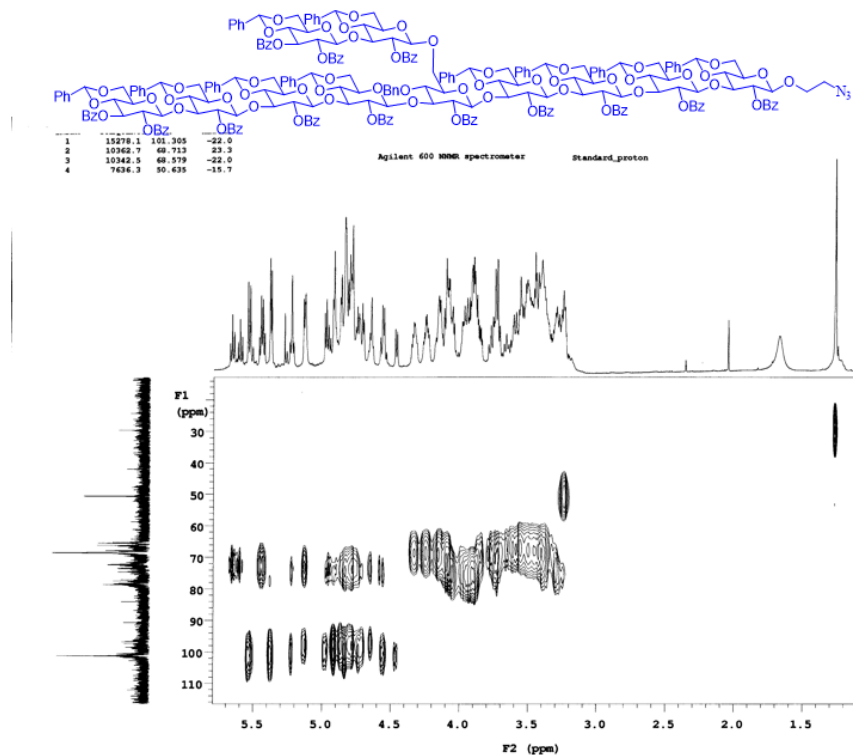

$^1\text{H}$ - $^{13}\text{C}$  HMQC Spectrum of compound **18** ( $\text{CDCl}_3$ , 600 MHz)

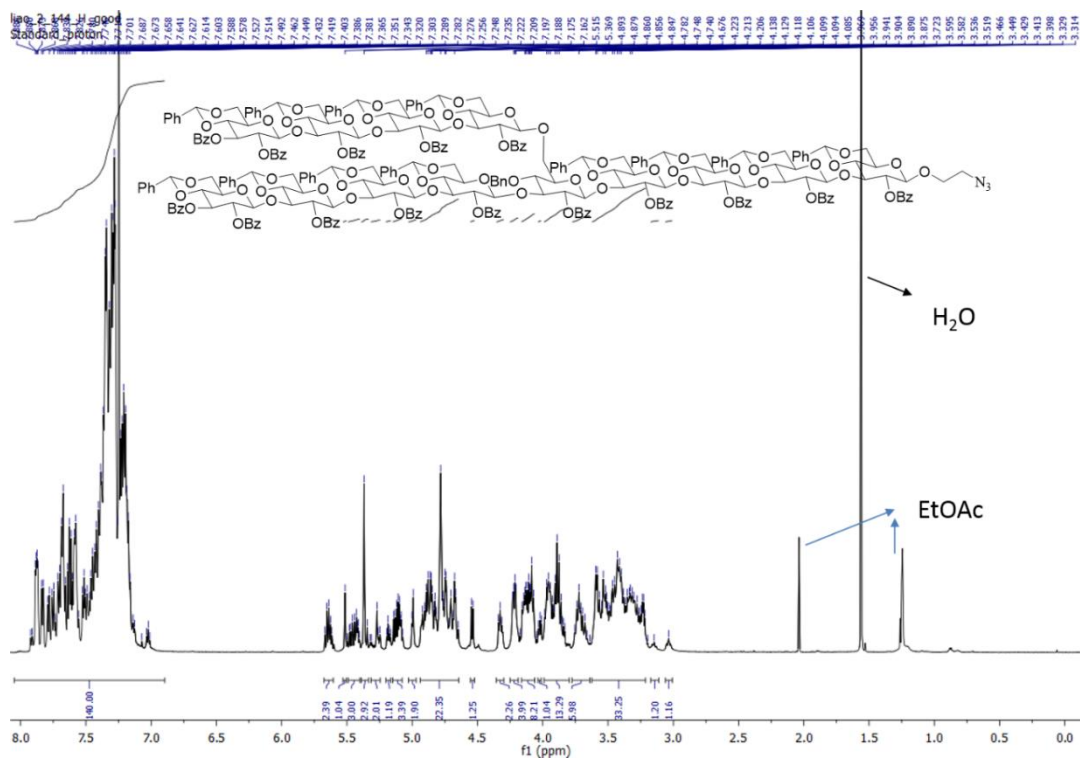

$^1\text{H}$  NMR Spectrum of compound **19** ( $\text{CDCl}_3$ , 600 MHz)

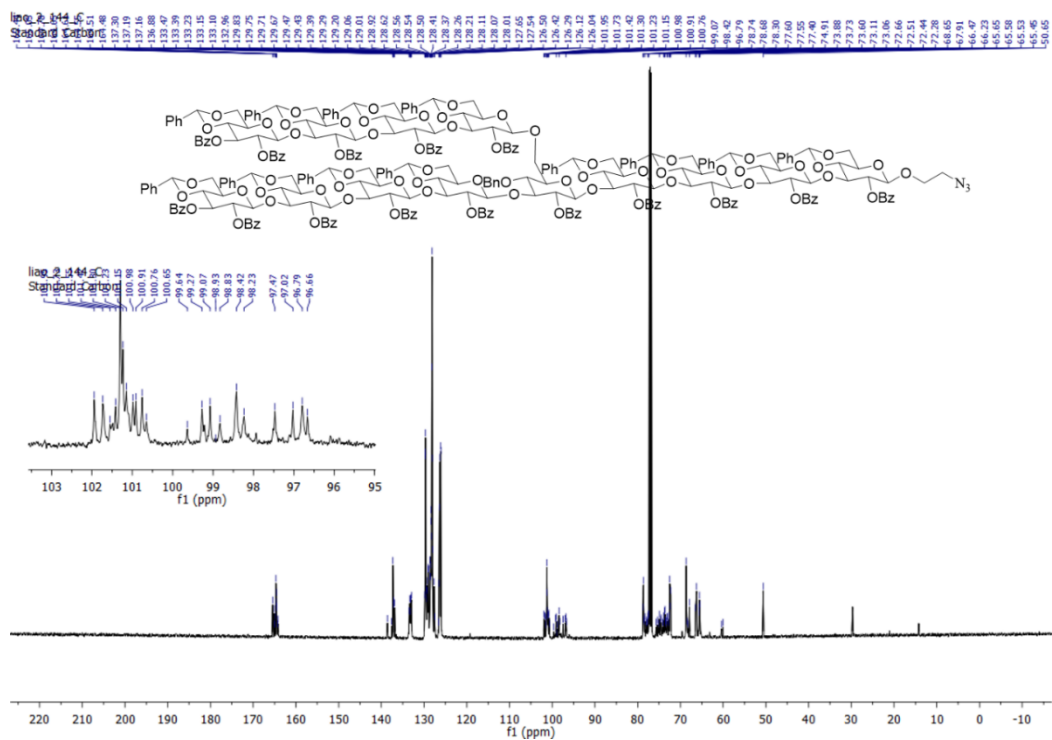

<sup>13</sup>C NMR Spectrum of compound **19** (CDCl<sub>3</sub>, 600 MHz)

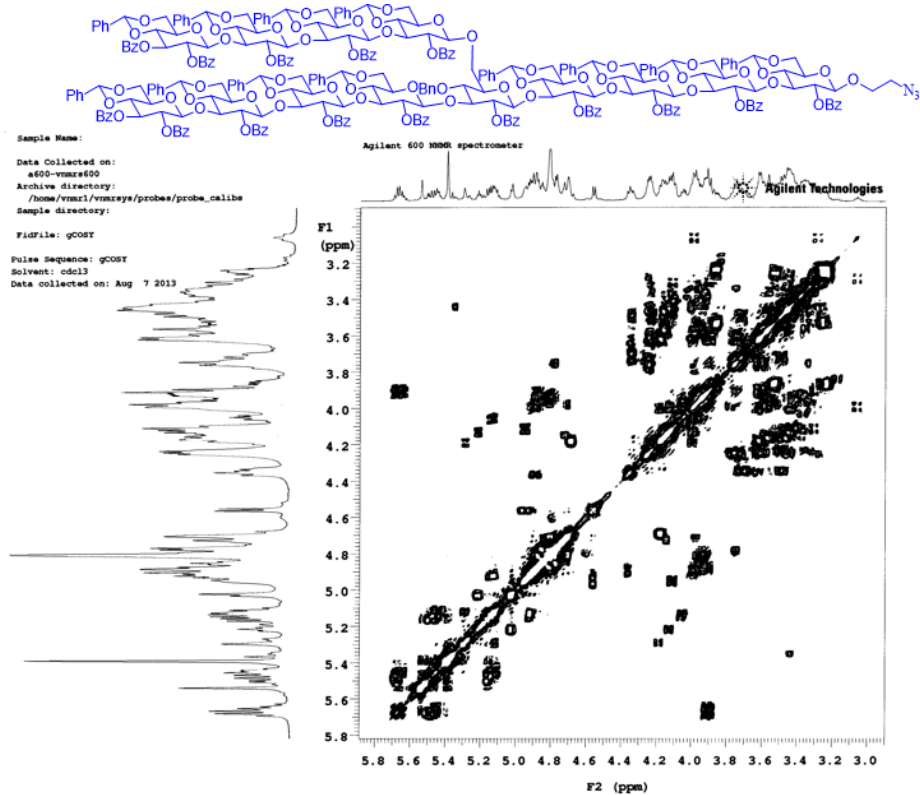

<sup>1</sup>H-<sup>1</sup>H COSY Spectrum of compound **19** (CDCl<sub>3</sub>, 600 MHz)

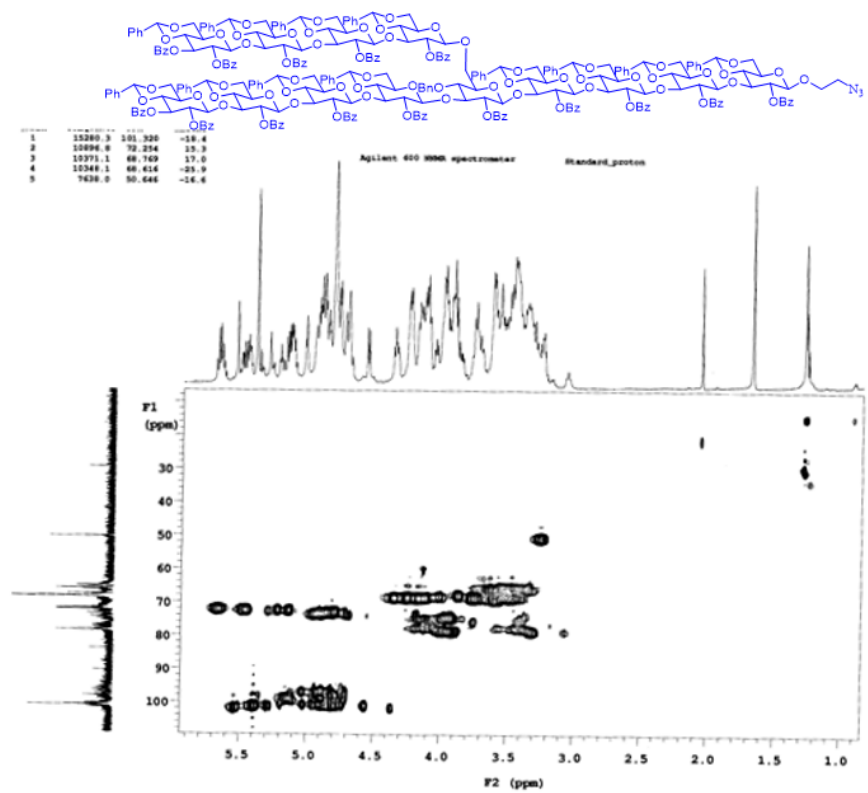

$^1\text{H}$ - $^{13}\text{C}$  HMQC Spectrum of compound **19** ( $\text{CDCl}_3$ , 600 MHz)

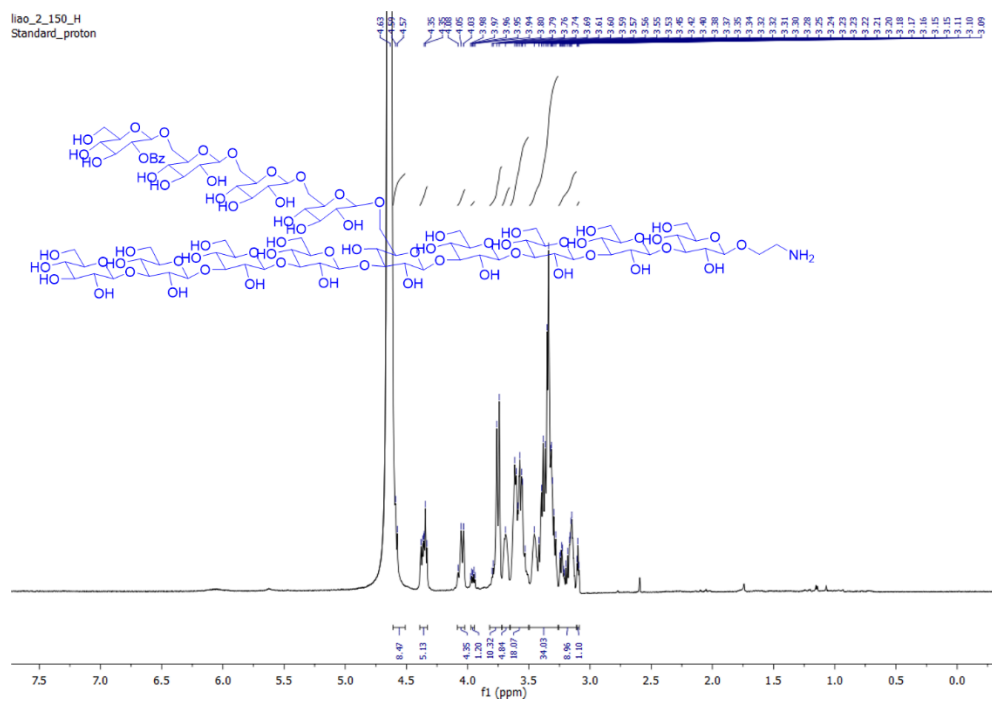

$^1\text{H}$  NMR Spectrum of compound **1** ( $\text{D}_2\text{O}$ , 600 MHz)

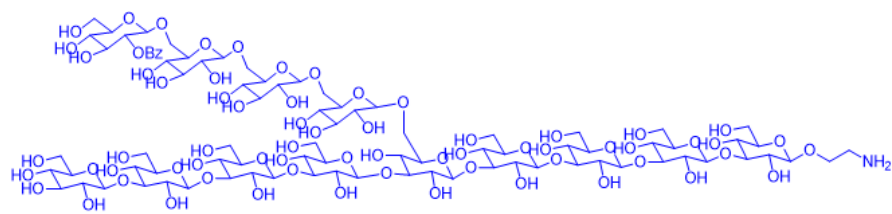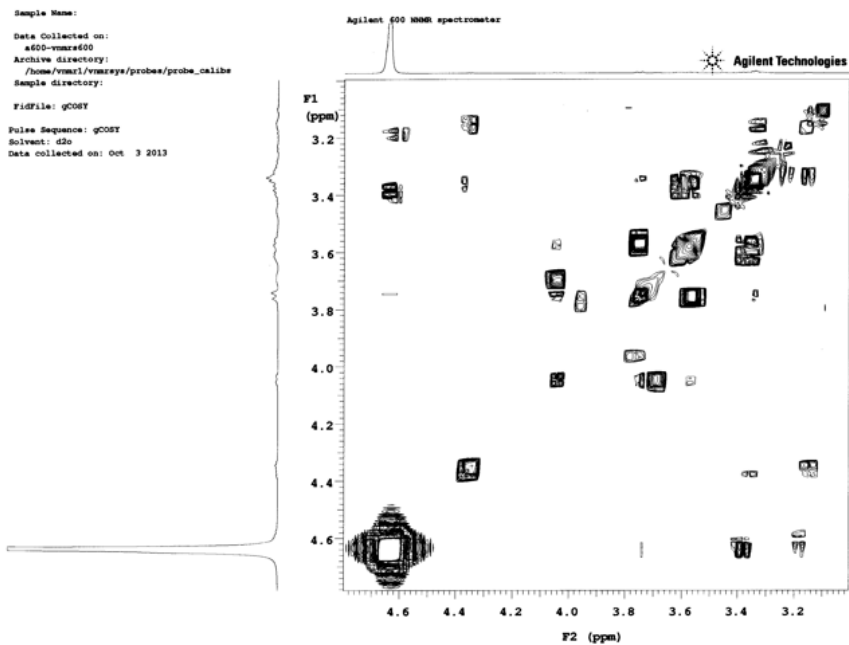

$^1\text{H}$ - $^1\text{H}$  COSY Spectrum of compound 1 ( $\text{D}_2\text{O}$ , 600 MHz)

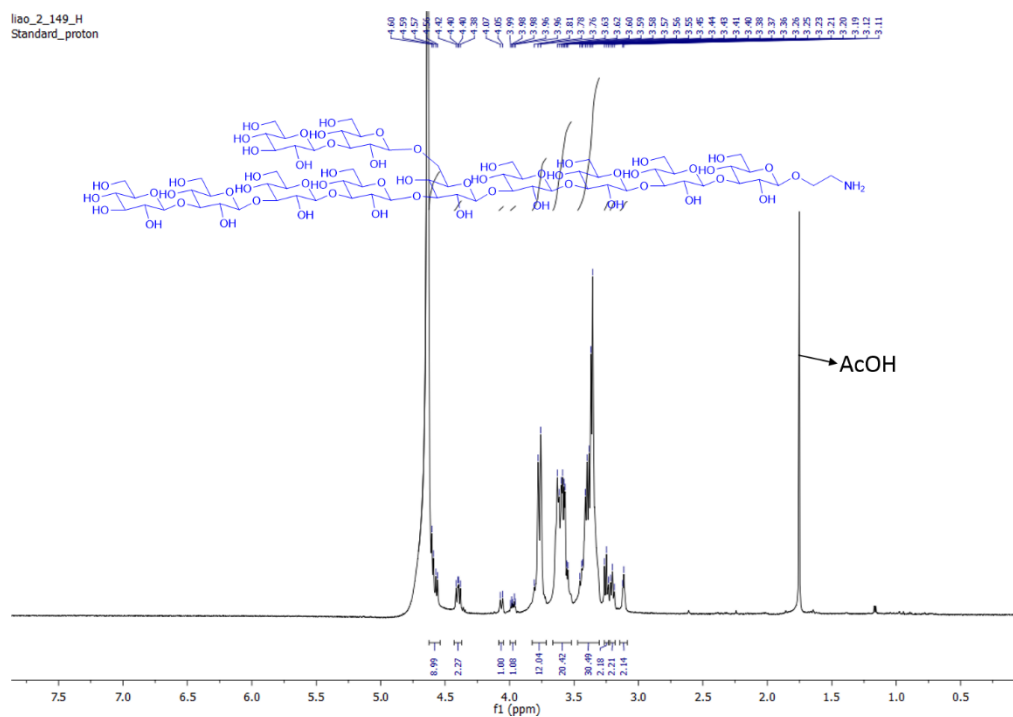

$^1\text{H}$  NMR Spectrum of compound 2 ( $\text{D}_2\text{O}$ , 600 MHz)

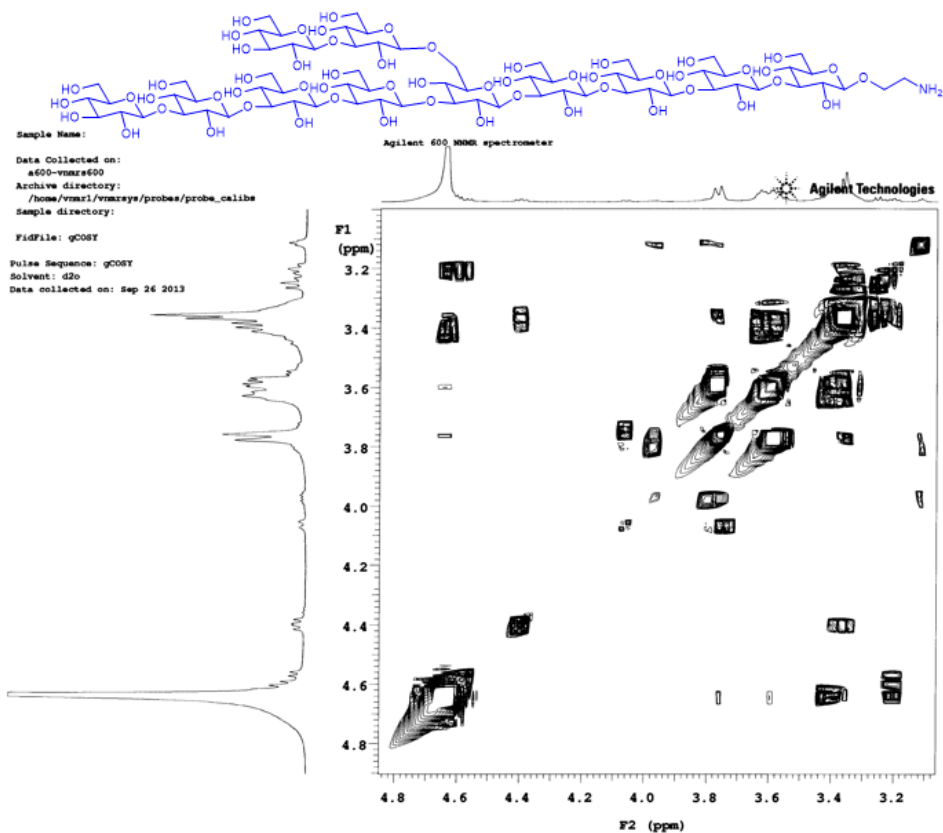

$^1\text{H}$ - $^1\text{H}$  COSY Spectrum of compound 2 ( $\text{D}_2\text{O}$ , 600 MHz)

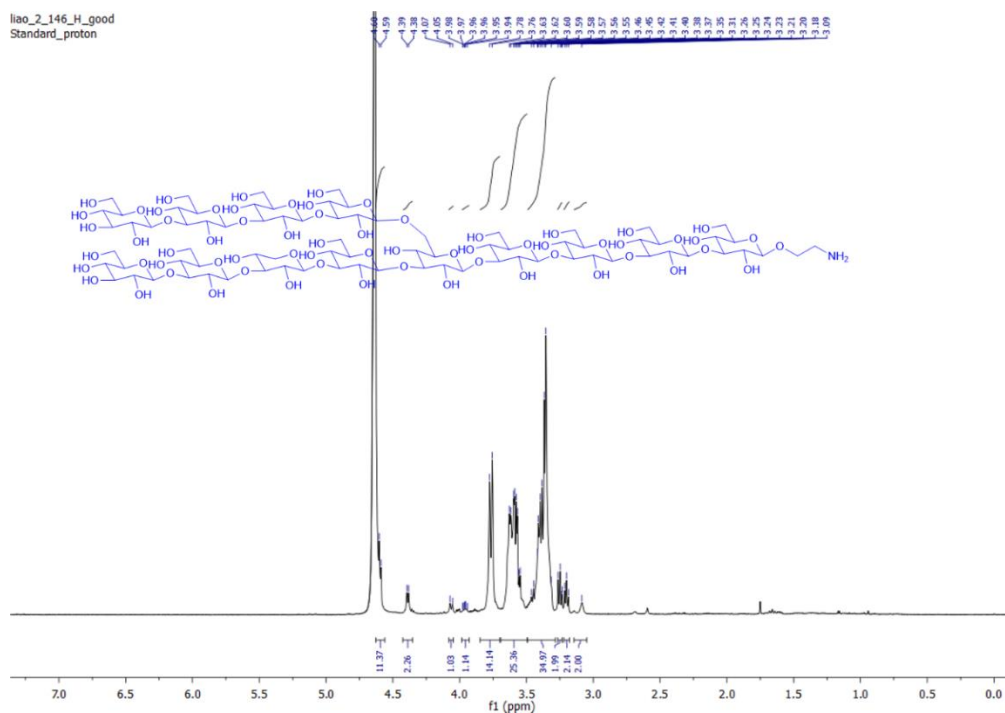

$^1\text{H}$  NMR Spectrum of compound 3 ( $\text{D}_2\text{O}$ , 600 MHz)

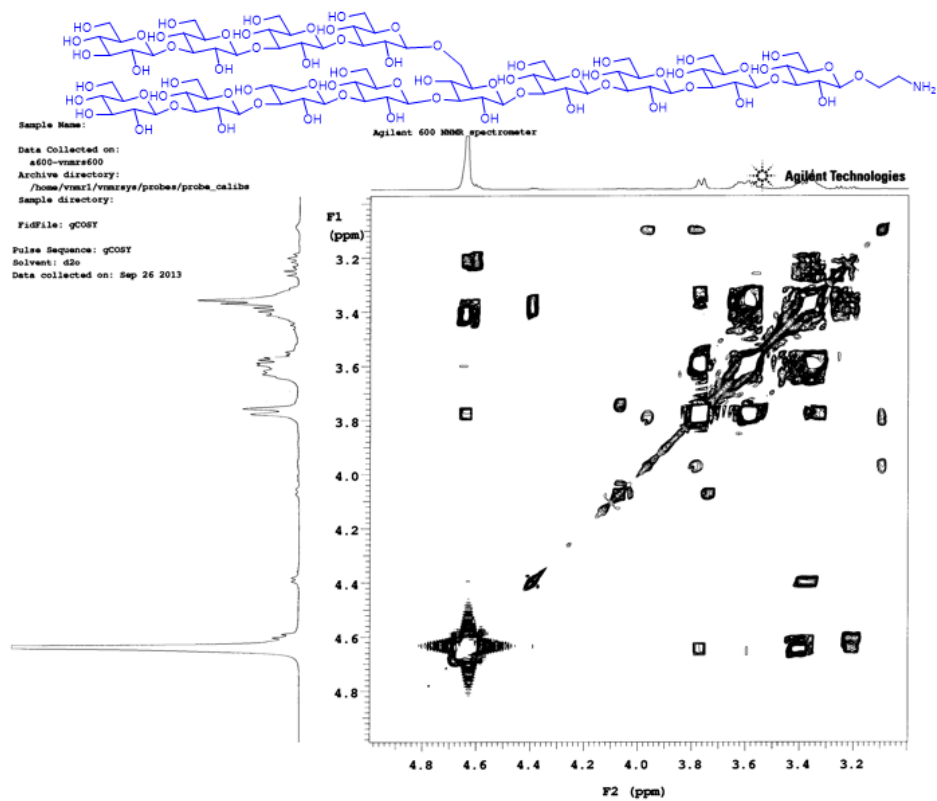

$^1\text{H}$ - $^1\text{H}$  COSY Spectrum of compound **3** ( $\text{D}_2\text{O}$ , 600 MHz)
